# Supplementary material for: Upcycle to recycle: triglyceride-derived magnesium soaps as stable, sustainable and efficient catalysts for poly(ethylene terephthalate) glycolysis
Source: Royal Society of Chemistry journal article supplement (doi:10.1039/d5su00862j), 2026-01-01
Supplement: d5su00862j1.pdf [file d5su00862j1.pdf]

## Electronic Supporting Information

### Upcycle to recycle: triglyceride-derived magnesium soaps as stable, sustainable and efficient catalysts for poly(ethylene terephthalate) glycolysis

Lorenzo Pedrini,<sup>a</sup> Anshul Jain,<sup>a</sup> Lauren Kenny,<sup>a</sup> David T. Mannion,<sup>b</sup> Kieran N. Kilcawley<sup>b</sup> and Stephen J. Connon<sup>a\*</sup>

<sup>a</sup>Trinity College Dublin, 152-160 Pearse St., Dublin 2, Ireland. E-mail: [connons@tcd.ie](mailto:connons@tcd.ie)

<sup>b</sup>Food Quality and Sensory Science Department, Teagasc Food Research Centre, Moorepark, Fermoy. Co Cork, Ireland.

#### Table of contents

1. General procedures
2. Supplementary glycolysis experimental procedures (Table 2) and associated NMR spectra
3. Cooking oil catalyst characterisation and spectra
4. Supplementary glycolysis experimental procedures using cooking oil-derived catalysts (Table 4)
5. Magnesium stearate recycling: procedure and associated spectrum
6. Pictures of the oils and oil-derived magnesium soap catalysts
7. Cooking oil-derived magnesium soap catalysts: fatty acid analysis
8. References

## 1. General procedures

### Cooking oil-derived catalyst synthesis

A 50 mL round bottomed flask was charged with a stirring bar, 5.00 g of oil, 2.00 g of NaOH, and 10 mL of deionised water. The mixture was stirred at 90 °C for 3 h, during which time the oil disappears due to saponification. The reaction mixture was then poured into a 500 mL beaker and diluted with 300 mL of deionised water. The temperature of the beaker liquid was brought to 90 °C. Once the solution reached this temperature, the pH was adjusted to ca. 9 with aqueous NaOH. Next, a solution of 2.00 g of MgCl<sub>2</sub> in 20 mL of deionised water was added dropwise to the vigorously stirred hydrolysed oil solution. As the addition progressed, a solid precipitate began to form. After complete addition, the mixture was cooled to 0 °C, and the solid was washed with deionised water and filtered. The collected solid was dried in a vacuum oven at 60 °C overnight, yielding the oil-derived magnesium soap.

### Catalytic PET glycolysis - isolation of BHET

An oven-dried carousel flask was charged with polyethylene terephthalate flakes (1.0000 g ± 0.0050 g, 5 mm x 5 mm), ethylene glycol (3.6 mL, 4 g) and catalyst.<sup>a,b</sup> The flask was placed under a nitrogen atmosphere (balloon), and the reaction was stirred (800 rpm) for the time and temperature indicated. The flask was removed from the carousel and was left to cool for 5 min. The reaction mixture was then diluted with deionised water (400 mL), and the resulting aqueous mixture was vigorously stirred for 20 min. Utilising a Bucker funnel the mixture was filtered and the pre-weighed filter paper was dried overnight in a vacuum oven at 60 °C to determine levels of unreacted PET residue and oligomers. The filtrate was concentrated *in vacuo* to a total of 50 mL and cooled to 4 °C overnight to enhance crystallisation. The resulting crystals were filtered and dried overnight in a vacuum oven at 60 °C to obtain BHET as a crystalline white solid.

<sup>a</sup>Glycolysis experiments were accomplished with Radleys Carousel 12 Plus Reaction Station.

<sup>b</sup>Mol% of catalyst is related to the number of moles of monomeric units (5.2 mmol) present in 1 g of polymer.

### Catalytic PET glycolysis - determination of yield by <sup>1</sup>H NMR spectroscopy

An oven-dried carousel flask was charged with polyethylene terephthalate flakes (1.0000 g ± 0.0050 g, 5 mm x 5 mm), ethylene glycol (3.6 mL, 4 g) and catalyst.<sup>a,b</sup> The flask was placed under a nitrogen atmosphere (balloon), and the reaction was stirred for the time and temperature indicated. The flask was removed from the carousel and was left to cool for 5 min. The reaction mixture was transferred in a 50 mL beaker, the internal standard was added ((*E*)-stilbene, 2 mmol, 0.3605 g) and the mixture was diluted by adding 15 mL of DMSO-*d*<sub>6</sub>. The cloudy suspension was vigorously stirred while keeping the plate temperature at 50 °C until a clear solution save a small amount of insoluble catalyst was obtained. A sample of the reaction mixture (~ 3 drops) was diluted to ca. 1 mL with DMSO-*d*<sub>6</sub>. The obtained sample was analysed by qH{<sup>13</sup>C}NMR to determine BHET yield.<sup>c,d</sup>

<sup>a</sup>Glycolysis experiments were accomplished with Radleys Carousel 12 Plus Reaction Station.

<sup>b</sup>Mol% of catalyst is related to the number of moles of monomeric units (5.2 mmol) present in 1 g of polymer.

$^1\text{H}\{^{13}\text{C}\}$  NMR, 400 MHz, D<sub>1</sub> = 15 s, GARP-mediated  $^{13}\text{C}$  decoupling.

$^d$ Yield was calculated by subtraction of the integrals associated with the soluble oligomeric fraction 4.68 ppm (4H) from the integral associated with the  $-\text{CH}_2-$  signal at 3.72 ppm (4H).

Resonances relevant for yield calculation:

|   |          |                                                                      |
|---|----------|----------------------------------------------------------------------|
| A | 3.72 ppm | BHET (4H) + BHET dimer (4H)                                          |
| B | 4.68 ppm | BHET dimer (4H)                                                      |
| C | 7.38 ppm | ( <i>E</i> )-stilbene (4H)<br>(set as reference integration to 1.00) |

$$\begin{aligned}\% \text{yield} &= \frac{(\text{int. A} - \text{int. B})}{\text{theoretical mmol}} \times \frac{C \text{ mmol}}{\text{int. C}} \times 100 \\ &= \frac{(\text{int. A} - \text{int. B})}{5.2 \text{ mmol}} \times 2 \text{ mmol} \times 100\end{aligned}$$

### Synthesis of magnesium stearate (**11**) using dibutylmagnesium

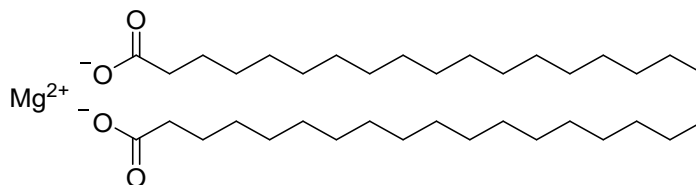

An oven-dried round-bottomed flask was charged with stearic acid (0.28 g, 1 mmol) and anhydrous Et<sub>2</sub>O (40 mL), the mixture was kept under argon atmosphere, it was stirred until complete dissolution of the acid and cooled to 0 °C. A solution of dibutylmagnesium (0.47 mL, 0.47 eq., 1 M in heptane) was added dropwise and formed a white precipitate. The resulting suspension was stirred for 1 h at room temperature and it was filtered with a Buckner funnel. The residue was washed with CHCl<sub>3</sub> (3 x 20 mL) and was dried in a vacuum oven for 4 h at 60° C to yield **11** as a white solid (0.21 g, 74%). Dec.p. 359.2 °C (Measured at the onset of a TGA spectrum)

$\delta_{\text{C}}$  (101 MHz, CP/MAS SSNMR) 182.1, 38.0, 33.0, 27.4, 24.2, 14.4 ppm.

HRMS ( $m/z$  – DIP APCI): Found: 283.2687 ( $\text{M}^-$ ) C<sub>18</sub>H<sub>35</sub>O<sub>2</sub><sup>-</sup> Requires: 283.2643.

$\nu_{\text{MAX}}$  (neat)/cm<sup>-1</sup>: 2956, 2917, 2850, 1580, 1461, 1315, 1265, 1116, 885, 825, 767, 720.

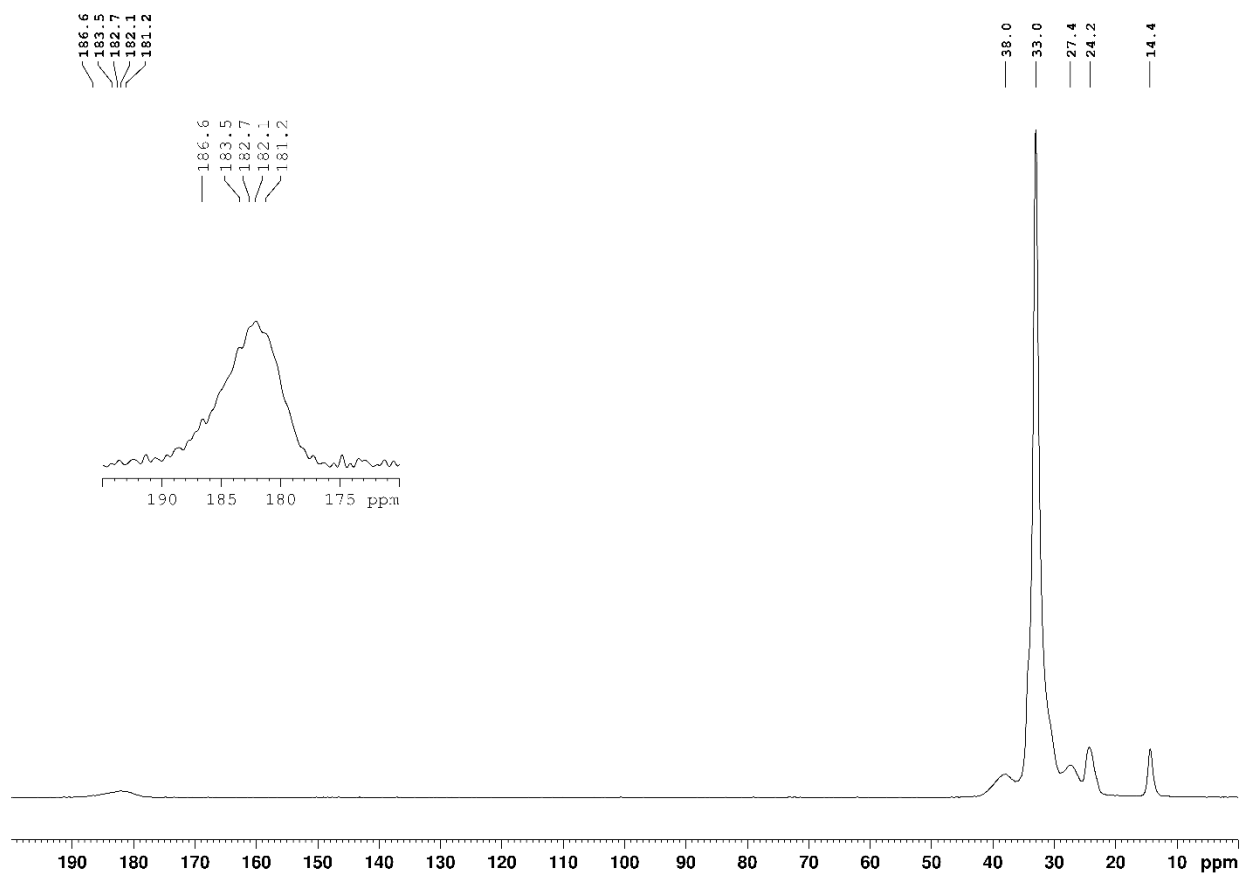

**$^{13}\text{C}$  CP/MAS SSNMR spectrum of 11 synthesised using dibutylmagnesium (100.6 MHz, 20 °C, spin rate 20 kHz, contact time 1.5 ms, 80 kHz proton decouple)**

### Synthesis of magnesium stearate (**11**) using $\text{MgCl}_2$

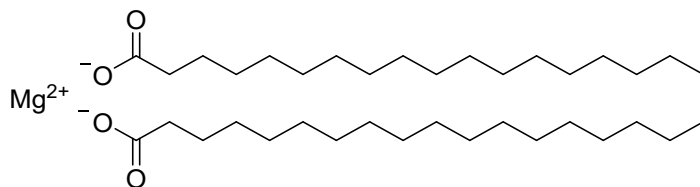

A 400 mL beaker was charged with deionised  $\text{H}_2\text{O}$  (300 mL) and stearic acid (1.42 g, 5 mmol), heated to 90 °C, and adjusted to pH 10. The suspension was stirred until full solubilisation of the acid was achieved. In a separate beaker,  $\text{MgCl}_2$  (0.29 g, 3 mmol) was dissolved in  $\text{H}_2\text{O}$  (20 mL), and the solution was added dropwise to the first beaker at a rate of 1 mL per minute using a syringe pump to yield the precipitation of a white solid. The resulting suspension was gradually cooled to room temperature to favour flocculation of the precipitate. The solid was filtered, washed with  $\text{H}_2\text{O}$  (2 x 50 mL), and dried in a vacuum oven for 8 h at 60 °C to yield **11** as a white solid (1.46 g, 99%). Dec.p. 339.9 °C (measured at the onset of a TGA spectrum)

$\delta_{\text{C}}$  (101 MHz, CP/MAS SSNMR) 182.8, 182.4, 181.8, 180.6, 178.9, 40.6, 39.1, 37.5, 33.2, 28.3, 27.2, 26.6, 25.3, 24.3, 15.4, 14.7, 14.2 ppm.

HRMS ( $m/z$  – DIP APCI<sup>-</sup>): Found: 283.2675 ( $\text{M}^-$ )  $\text{C}_{18}\text{H}_{35}\text{O}_2^-$  Requires: 283.2643.

$\nu_{\text{MAX}}$  (neat)/ $\text{cm}^{-1}$ : 2916, 2850, 1574, 1459, 1336, 1305, 1265, 1038, 877, 721, 687.

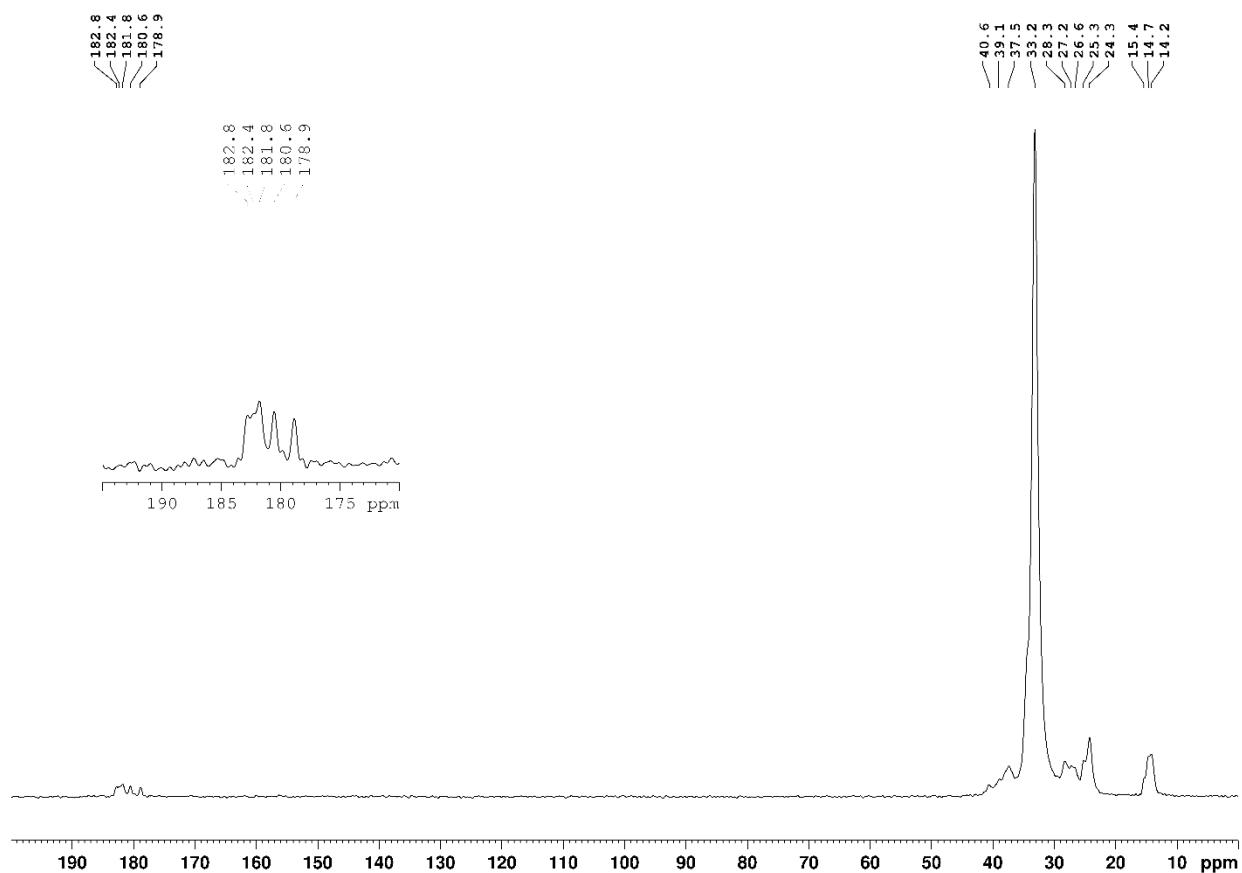

**$^{13}\text{C}$  CP/MAS SSNMR spectrum of 11 synthesised using  $\text{MgCl}_2$  (100.6 MHz, 20 °C, spin rate 20 kHz, contact time 1.5 ms, 80 kHz proton decouple)**

### Synthesis of magnesium hexanoate (**12**)

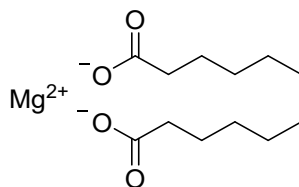

An oven-dried round-bottomed flask was charged with hexanoic acid (0.25 mL, 2 mmol) and anhydrous Et<sub>2</sub>O (80 mL), the mixture was kept under argon atmosphere, it was stirred until complete dissolution of the acid and cooled to 0 °C. A solution of dibutylmagnesium (0.96 mL, 0.96 eq., 1 M in heptane) was added dropwise and formed a white precipitate. The resulting suspension was stirred for 1 h at room temperature and the solvent evaporated under reduced pressure. The residue was triturated with CHCl<sub>3</sub> (20 mL) and the resulting solid was filtered, washed with CHCl<sub>3</sub> (20 mL) and dried in a vacuum oven for 4 h at 60° C to yield **12** as a white solid (0.22 g, 88%). Dec.p. 332.6 °C (measured at the onset of a TGA spectrum)

$\delta_c$  (101 MHz, CP/MAS SSNMR) 181.7, 37.8, 32.3, 26.0, 23.0, 14.1 ppm.

HRMS ( $m/z$  – DIP APCI<sup>+</sup>): Found: 115.0783 ( $M^+$ ) C<sub>6</sub>H<sub>11</sub>O<sub>2</sub><sup>+</sup> Requires: 115.0765.

$\nu_{MAX}$  (neat)/cm<sup>-1</sup>: 2957, 2930, 2866, 1569, 1422, 1343, 1318, 1228, 1193, 1110, 963, 893, 850, 778, 731, 672.

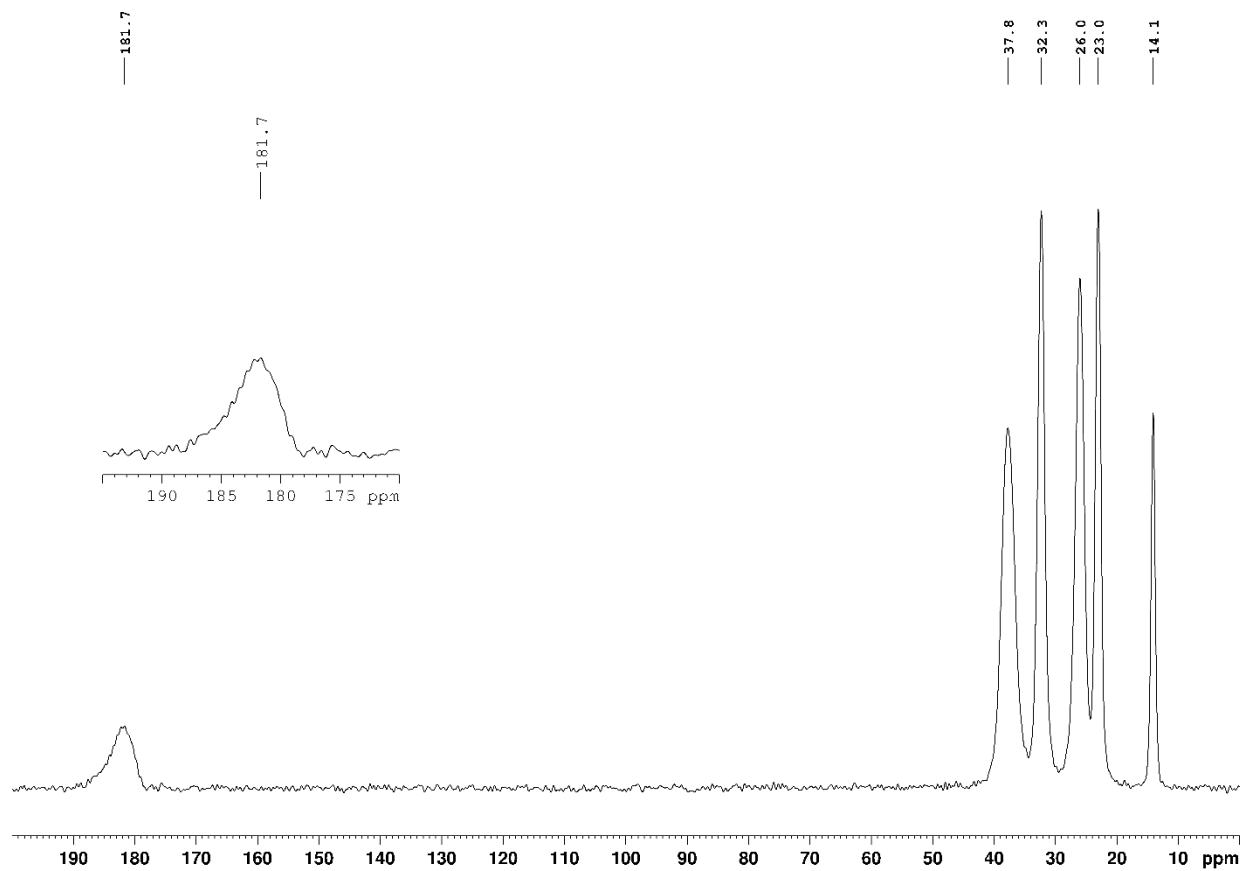

**$^{13}\text{C}$  CP/MAS SSNMR spectrum of 12 (100.6 MHz, 20 °C, spin rate 20 kHz, contact time 1.0 ms, 80 kHz proton decouple)**



### Synthesis of magnesium decanoate (**13**)

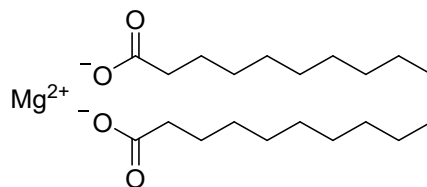

An oven-dried round-bottomed flask was charged with decanoic acid (0.35 g, 2 mmol) and anhydrous  $\text{Et}_2\text{O}$  (80 mL), the mixture was kept under argon atmosphere, it was stirred until complete dissolution of the acid and cooled to 0 °C. A solution of dibutylmagnesium (0.96 mL, 0.96 eq., 1 M in heptane) was added dropwise and formed a white precipitate. The resulting suspension was stirred for 1 h at room temperature and the solvent evaporated under reduced pressure. The residue was triturated with  $\text{CHCl}_3$  (20 mL) and the resulting solid was filtered, washed with  $\text{CHCl}_3$  (20 mL) and dried in a vacuum oven for 4 h at 60° C to yield **13** as a white solid (0.34 g, 97%). Dec.p. 327.1 °C (measured at the onset of a TGA spectrum)

$\delta_{\text{C}}$  (101 MHz, CP/MAS SSNMR) 182.3, 38.0, 32.6, 30.6, 26.7, 23.1, 14.1 ppm.

HRMS ( $m/z$  – DIP APCI<sup>+</sup>): Found: 171.1384 ( $\text{M}^+$ )  $\text{C}_{10}\text{H}_{19}\text{O}_2^-$  Requires: 171.1391.

$\nu_{\text{MAX}}$  (neat)/ $\text{cm}^{-1}$ : 2957, 2922, 2853, 1572, 1433, 1314, 1115, 720.9, 670.

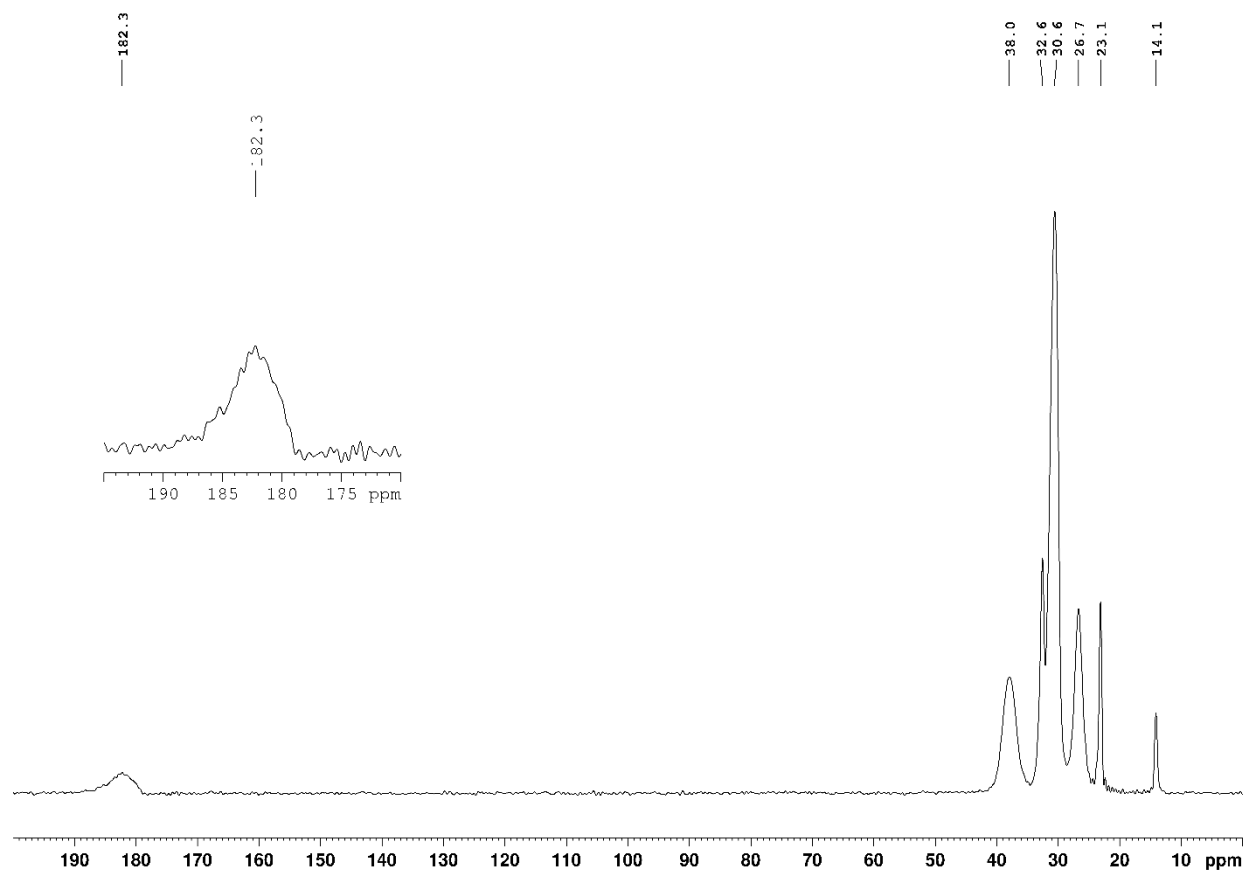

**$^{13}\text{C}$  CP/MAS SSNMR spectrum of 13 (100.6 MHz, 20 °C, spin rate 20 kHz, contact time 1.0 ms, 80 kHz proton decouple)**

### Synthesis of magnesium tetradecanoate (**14**)

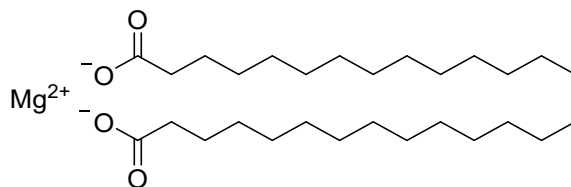

An oven-dried round-bottomed flask was charged with tetradecanoic acid (0.46 g, 2 mmol) and anhydrous  $\text{Et}_2\text{O}$  (40 mL), the mixture was kept under argon atmosphere, it was stirred until complete dissolution of the acid and cooled to 0 °C. A solution of dibutylmagnesium (0.96 mL, 0.96 eq., 1 M in heptane) was added dropwise and formed a white precipitate. The resulting suspension was stirred for 1 h at room temperature and the solvent evaporated under reduced pressure. The residue was triturated with  $\text{CHCl}_3$  (20 mL) and the resulting solid was filtered, washed with  $\text{CHCl}_3$  (20 mL) and dried in a vacuum oven for 4 h at 60° C to yield **14** as a white solid (0.30 g, 65%). Dec.p. 321.0 °C (measured at the onset of a TGA spectrum)

$\delta_{\text{C}}$  (101 MHz, CP/MAS SSNMR) 181.4, 38.0, 34.3, 33.0, 27.3, 24.6, 14.3 ppm.

HRMS ( $m/z$  – DIP APCI<sup>+</sup>): Found: 227.2070 ( $\text{M}^+$ )  $\text{C}_{14}\text{H}_{27}\text{O}_2^-$  Requires: 227.2017.

$\nu_{\text{MAX}}$  (neat)/ $\text{cm}^{-1}$ : 2957, 2918, 2850, 1574, 1454, 1318, 1244, 1115, 721.

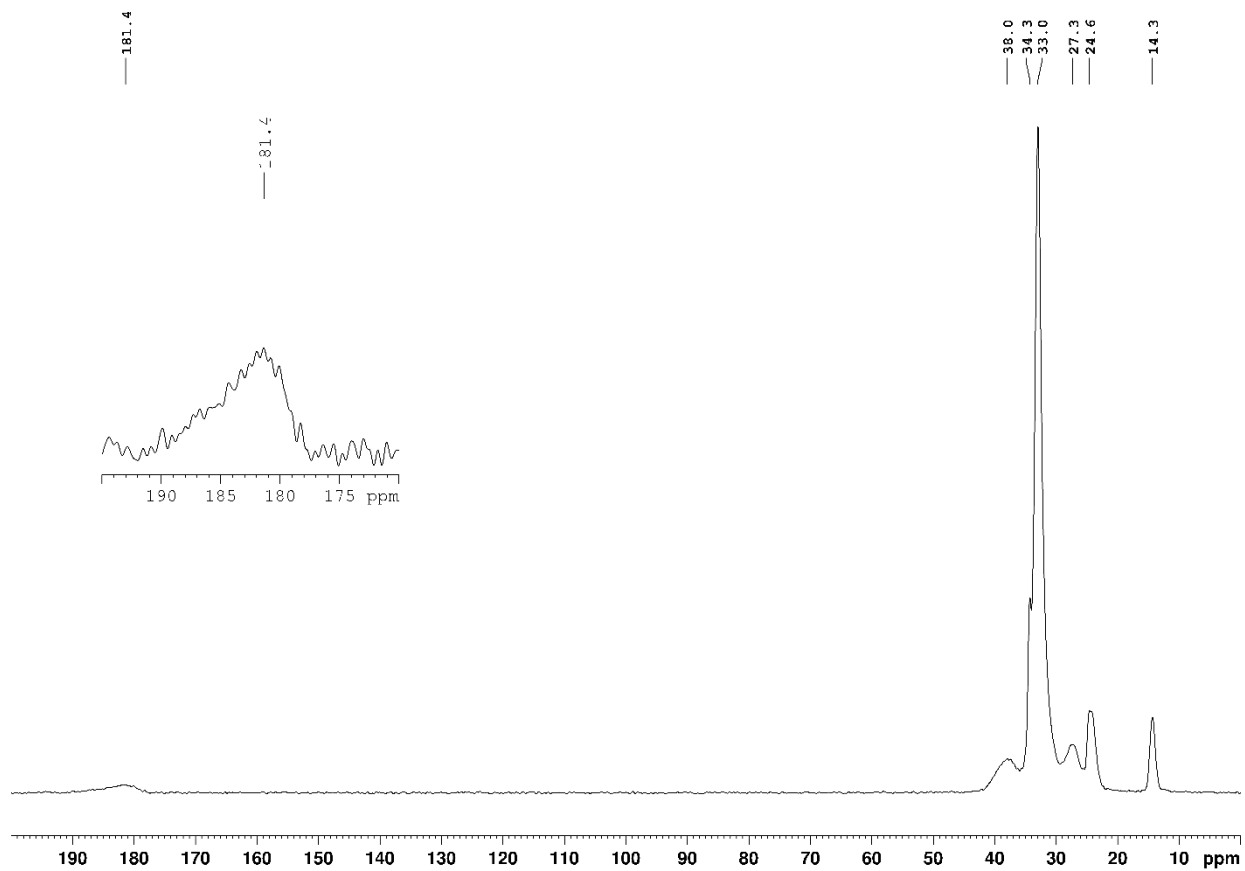

**$^{13}\text{C}$  CP/MAS SSNMR spectrum of 14 (100.6 MHz, 20 °C, spin rate 20 kHz, contact time 1.0 ms, 80 kHz proton decouple)**

### Synthesis of magnesium oleate (**15**)

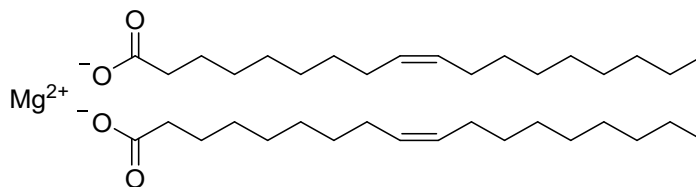

A 200 mL beaker was charged with deionised  $\text{H}_2\text{O}$  (100 mL) and oleic acid (0.32 mL, 1 mmol), heated to 90 °C, and adjusted to pH 10. The suspension was stirred until full solubilisation of the acid was achieved. In a separate beaker,  $\text{MgCl}_2$  (0.07 g, 0.75 mmol) was dissolved in  $\text{H}_2\text{O}$  (10 mL), and the solution was added dropwise to the first beaker at a rate of 1 mL per minute using a syringe pump to yield the precipitation of a white solid. The resulting suspension was gradually cooled to room temperature to favour flocculation of the precipitate. The solid was filtered, washed with  $\text{H}_2\text{O}$  (2 x 25 mL), and dried in a vacuum oven for 8 h at 60 °C to yield **15** as a white solid (0.29 g, 99%). Dec.p. 325.0 °C (measured at the onset of a TGA spectrum)

$\delta_{\text{C}}$  (101 MHz, CP/MAS SSNMR) 182.7, 129.9, 37.7, 32.4, 30.5, 29.1, 28.6, 27.9, 26.7, 23.1, 14.3 ppm.

HRMS ( $m/z$  – DIP APCI<sup>+</sup>): Found: 281.2540 ( $\text{M}^+$ )  $\text{C}_{18}\text{H}_{33}\text{O}_2^-$  Requires: 281.2486.

$\nu_{\text{MAX}}$  (neat)/ $\text{cm}^{-1}$ : 2922, 2853, 1575, 1441, 1314, 721.

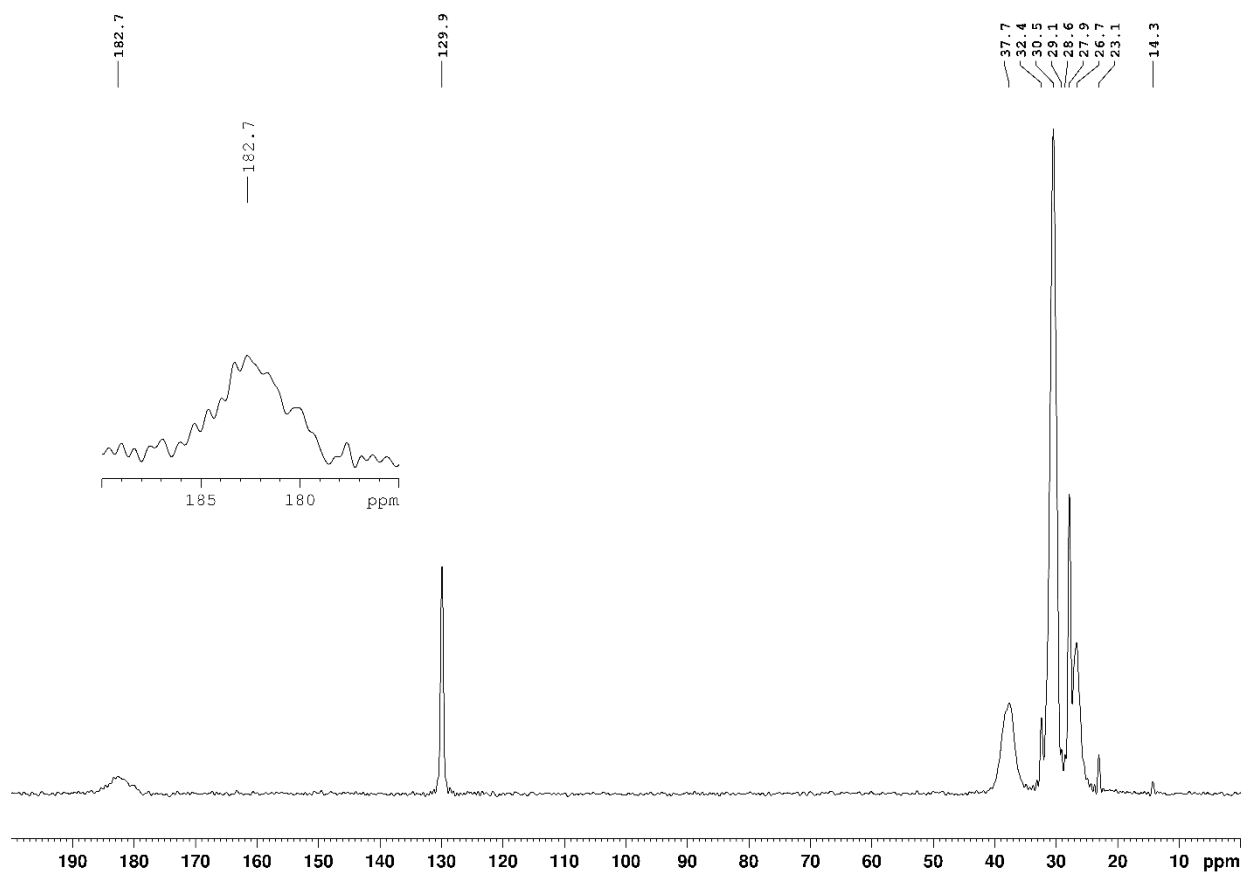

**$^{13}\text{C}$  CP/MAS SSNMR spectrum of 15 (100.6 MHz, 20 °C, spin rate 20 kHz, contact time 1.0 ms, 80 kHz proton decouple)**

### Synthesis of magnesium tetraeicosanoate (**16**)

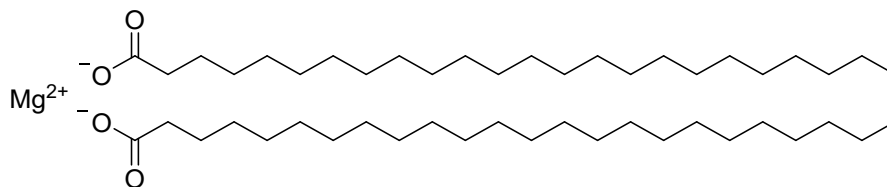

An oven-dried round-bottomed flask was charged with stearic acid (0.18 g, 0.5 mmol) and anhydrous Et<sub>2</sub>O (20 mL), the mixture was kept under argon atmosphere, it was stirred until complete dissolution of the acid and cooled to 0 °C. A solution of dibutylmagnesium (0.47 mL, 0.47 eq., 1 M in heptane) was added dropwise and formed a white precipitate. The resulting suspension was stirred for 1 h at room temperature and it was filtered with a Buckner funnel. The residue was washed with CHCl<sub>3</sub> (3 x 10 mL) and was dried in a vacuum oven for 4 h at 60° C to yield **16** as a white solid (0.17 g, 88%). Dec.p. 350.4 °C (measured at the onset of a TGA spectrum)

$\delta_c$  (101 MHz, CP/MAS SSNMR) 182.2, 37.8, 36.1, 33.1, 27.3, 24.5, 14.4 ppm.

HRMS ( $m/z$  – DIP APCI<sup>+</sup>): Found: 367.3640 ( $M^+$ ) C<sub>24</sub>H<sub>47</sub>O<sub>2</sub><sup>+</sup> Requires: 367.3582.

$\nu_{MAX}$  (neat)/cm<sup>-1</sup>: 2916, 2850, 1576, 1466, 1319, 1114, 719.

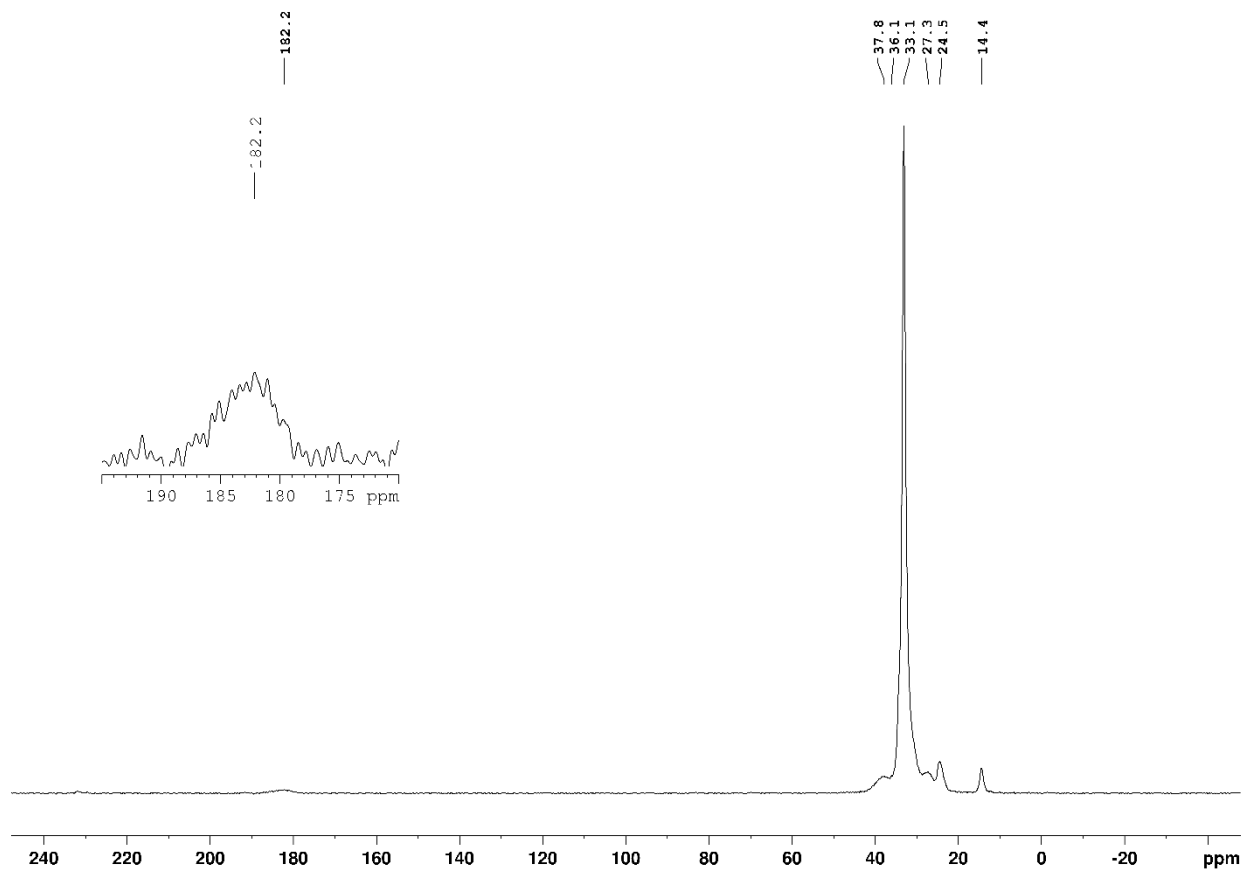

**$^{13}\text{C}$  CP/MAS SSNMR spectrum of 16 (100.6 MHz, 20 °C, spin rate 20 kHz, contact time 1.0 ms, 80 kHz proton decouple)**



## 2. Supplementary glycolysis experimental procedures and associated NMR spectra

### PET:EG (1:10, wt:wt) experimental procedure

An oven dried carousel flask was charged with polyethylene terephthalate flakes ( $0.5000 \text{ g} \pm 0.0025 \text{ g}$ , 5 mm x 5 mm), ethylene glycol (4.5 mL, 5 g) and magnesium stearate (0.0077 g, 0.013 mmol, 0.5 mol%).<sup>a,b</sup> The flask was placed under an atmosphere of nitrogen (balloon), and the reaction was stirred for 4 h at 180 °C. The flask was removed from the carousel and was left to cool for 5 min. The reaction mixture was then diluted with deionised water (200 mL), and the resulting aqueous mixture was vigorously stirred for 20 min. Utilising a Bucker funnel the mixture was filtered and the pre weighed filter paper was dried overnight in a vacuum oven at 60 °C to determine levels of unreacted PET residue and oligomers. The filtrate was evaporated to a total of 30 mL and cooled to 4 °C overnight to crystallise *bis*(2-hydroxyethyl)terephthalate (BHET). The resulting crystals were filtered and dried overnight in a vacuum oven at 60 °C to obtain BHET as a crystalline white solid (0.5276 g, 80%).

The mother liquor from the crystallisation process was evaporated to remove water and ethylene glycol; qH NMR analysis was performed using (*E*)-stilbene as the internal standard (1 mmol, 0.1803 g) to reveal the presence of 11% yield of BHET remaining in the crystallisation filtrate.

<sup>a</sup>Glycolysis experiments were accomplished with Radleys Carousel 12 Plus Reaction Station.

<sup>b</sup>Mol% of catalyst is related to the number of moles of monomeric units (2.6 mmol) present in 0.5 g of polymer.

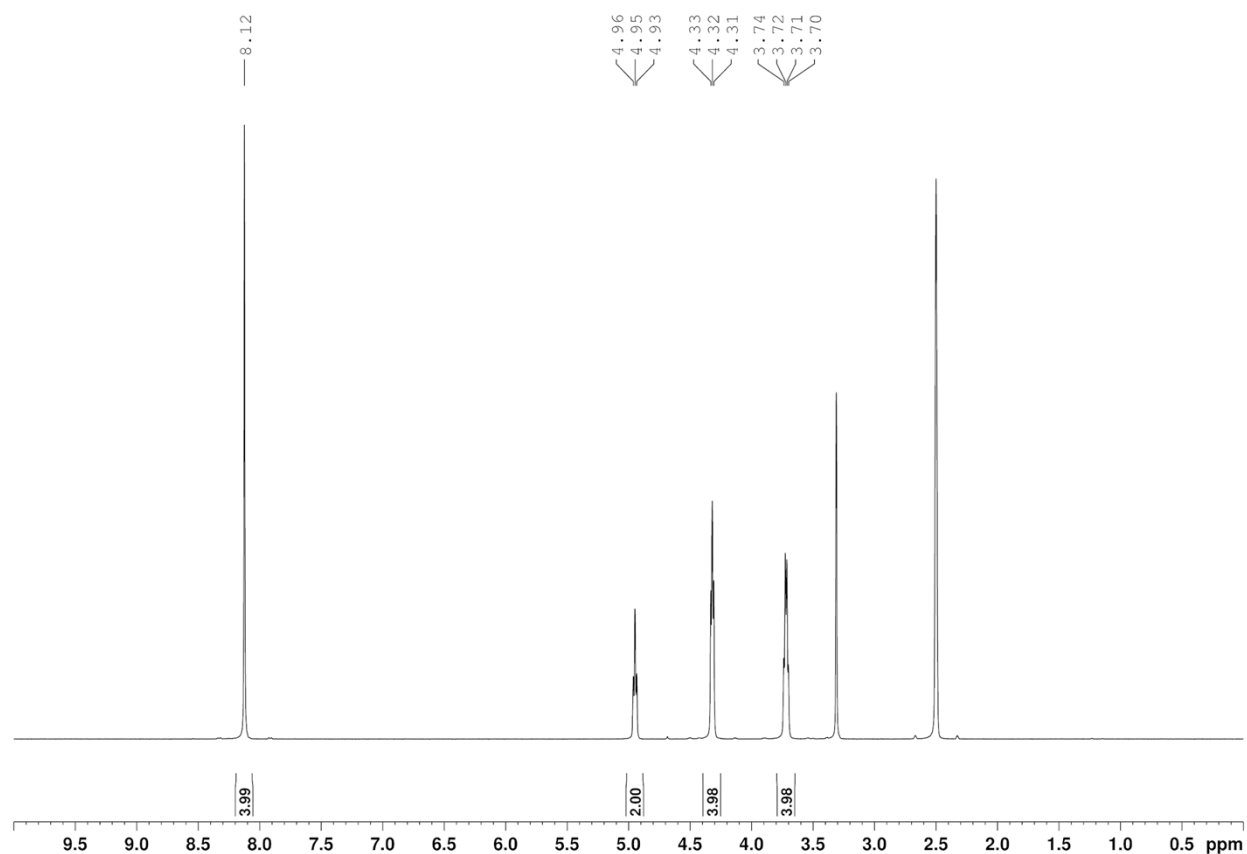

**$^1\text{H}$  NMR spectrum (400 MHz) of isolated BHET from the PET:EG (1:10, wt:wt) experiment**

**(Table 2, entry 7)**

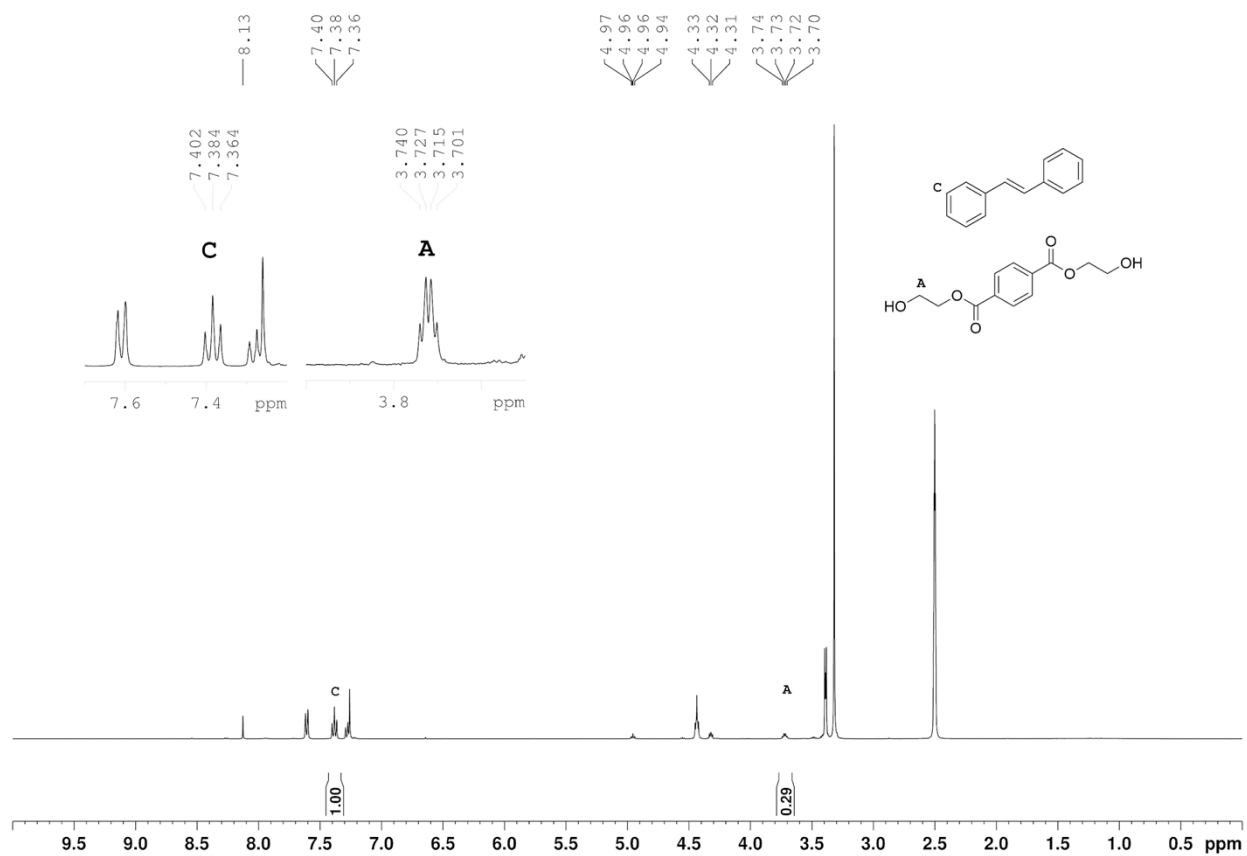

**$^1\text{H}$  NMR (400 MHz, D<sub>1</sub> = 15s) spectrum from the PET:EG (1:10, wt:wt) experiment: post crystallisation mother liquor analysis (Table 2, entry 7)**

### PET:EG (1:10, wt:wt) experimental procedure to determine the yield by $^1\text{H}$ NMR spectroscopy

An oven dried carousel flask was charged with polyethylene terephthalate (PET) flakes ( $0.5000 \text{ g} \pm 0.0025 \text{ g}$ , 5 mm x 5 mm), ethylene glycol (4.5 mL, 5 g) and magnesium stearate ( $0.0077 \text{ g}$ ,  $0.013 \text{ mmol}$ ,  $0.5 \text{ mol}\%$ ).<sup>a,b</sup> The flask was placed under an atmosphere of nitrogen (balloon), and the reaction was stirred for 4 h at  $180^\circ\text{C}$ . The flask was removed from the carousel and was left to cool for 5 min. The reaction mixture was transferred in a 50 mL beaker, the internal standard was added ((*E*)-stilbene,  $1 \text{ mmol}$ ,  $0.1803 \text{ g}$ ) and the mixture was diluted by adding 10 mL of  $\text{DMSO-}d_6$ . The cloudy suspension was vigorously stirred while keeping the plate temperature to  $50^\circ\text{C}$  until a clear solution save a small amount of insoluble catalyst. A sample of the reaction mixture ( $\sim 3$  drops) was diluted to ca. 1 mL with  $\text{DMSO-}d_6$ . The obtained sample was analysed by  $q\text{H}\{^{13}\text{C}\}$ NMR to determine BHET yield (95%).<sup>c,d</sup>

<sup>a</sup>Glycolysis experiments were accomplished with Radleys Carousel 12 Plus Reaction Station.

<sup>b</sup>Mol% of catalyst is related to the number of moles of monomeric units ( $2.6 \text{ mmol}$ ) present in  $0.5 \text{ g}$  of polymer.

<sup>c</sup> $q\text{H}\{^{13}\text{C}\}$ NMR, 400 MHz,  $\text{D1} = 15 \text{ s}$ , GARP-mediated  $^{13}\text{C}$  decoupling.<sup>1</sup>

<sup>d</sup>Yield value was calculated by subtraction of the  $-\text{CH}_2-$  signal at 3.72 ppm (4H) with the resonance associated with the soluble oligomeric fraction 4.68 ppm (4H).<sup>2</sup>

Resonances relevant for yield calculation:

|   |   |          |                             |                           |
|---|---|----------|-----------------------------|---------------------------|
| A | - | 3.72 ppm | BHET (4H) + BHET dimer (4H) |                           |
| B | - | 4.68 ppm | BHET dimer (4H)             |                           |
| C | - | 7.38 ppm | ( <i>E</i> )-stilbene (4H)  | - set integration to 1.00 |

$$\%yield = \frac{(int. A - int. B)}{theoretical\ mmol} \times \frac{C\ mmol}{int. C} * 100 = \frac{(int. A - int. B)}{2.6\ mmol} \times 1\ mmol * 100 = 95\%$$

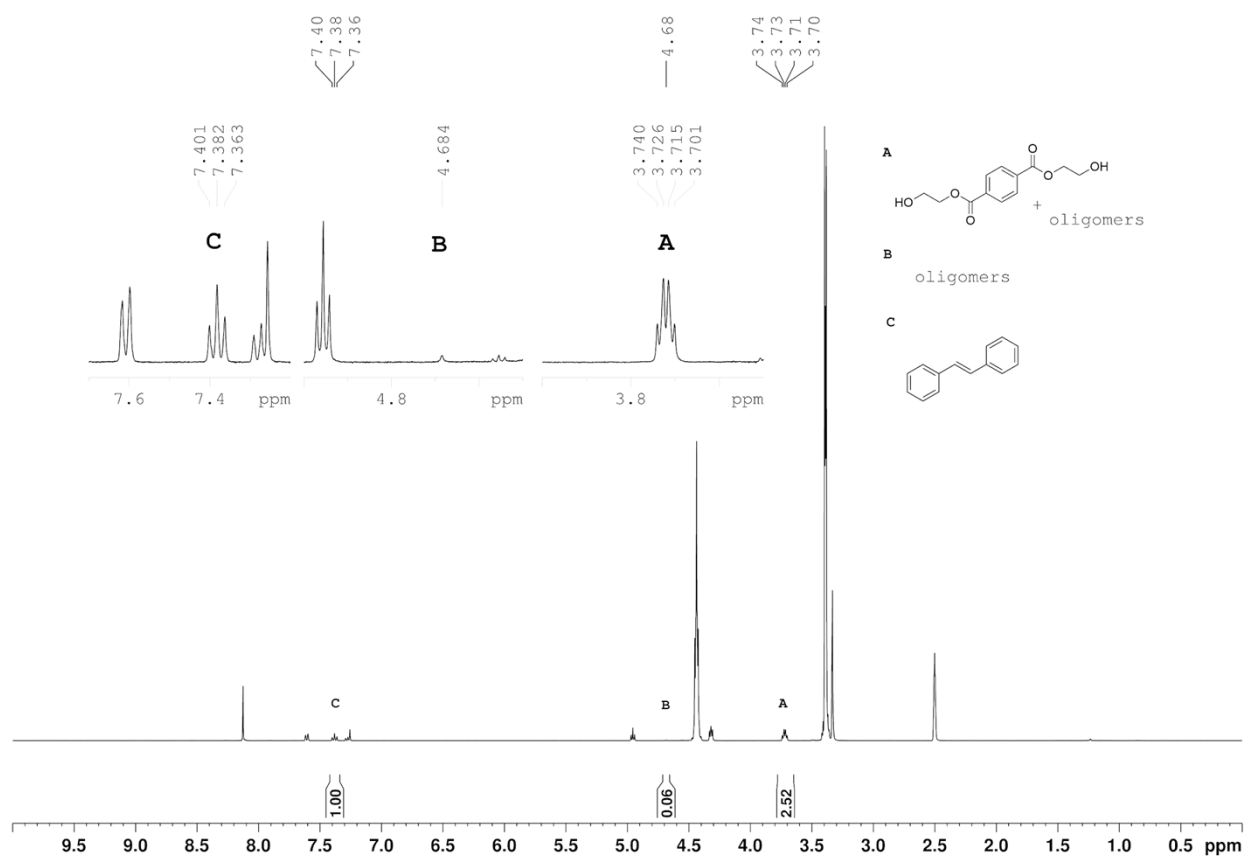

**$^1\text{H}\{^{13}\text{C}\}$  NMR (400 MHz, D<sub>1</sub> = 15 s, GARP-mediated  $^{13}\text{C}$  decoupling) of PET:EG (1:10, wt:wt) experiment for NMR yield calculation, internal standard (*E*)-stilbene (Table 2, entry 8)**

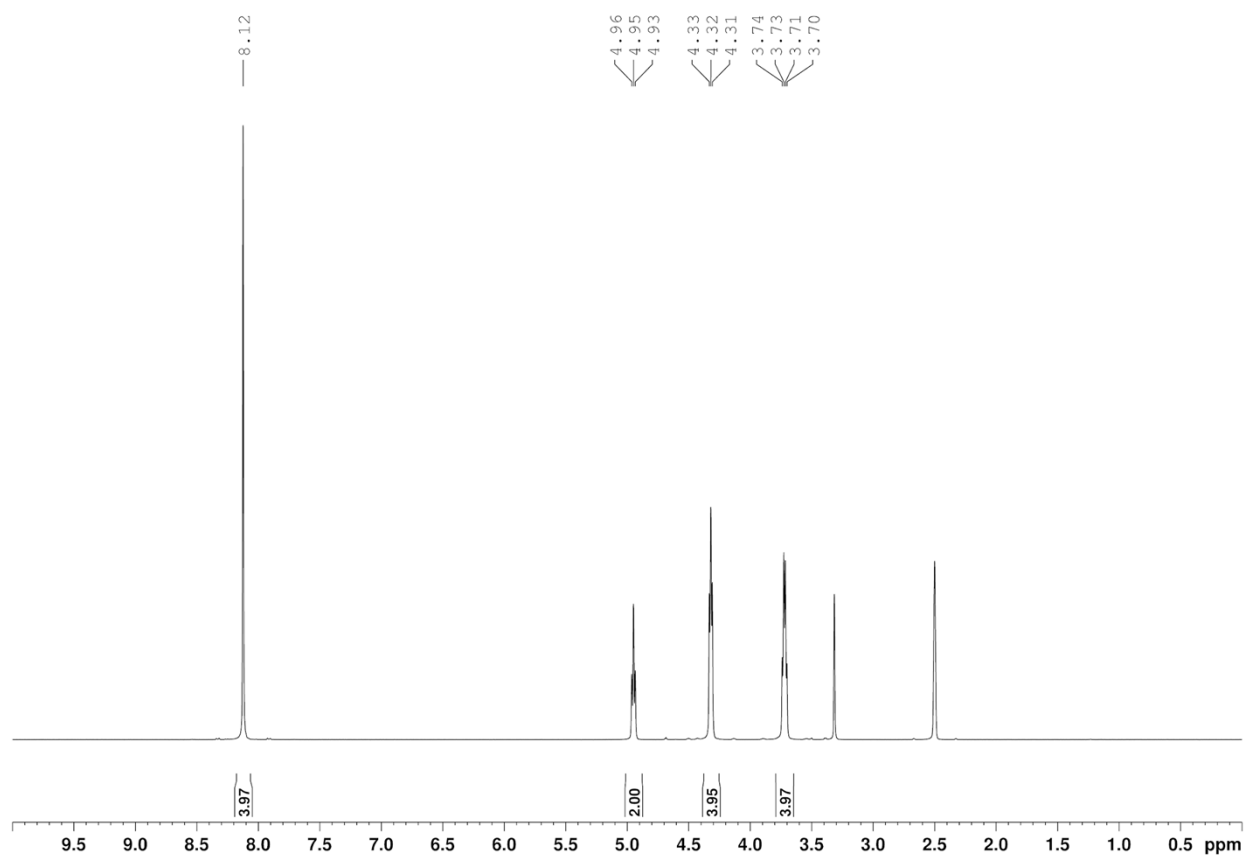

$^1\text{H}$  NMR (400 MHz) spectrum of BHET from the PET:EG (1:4, *wt:wt*) experiment (Table 2, entry 1)

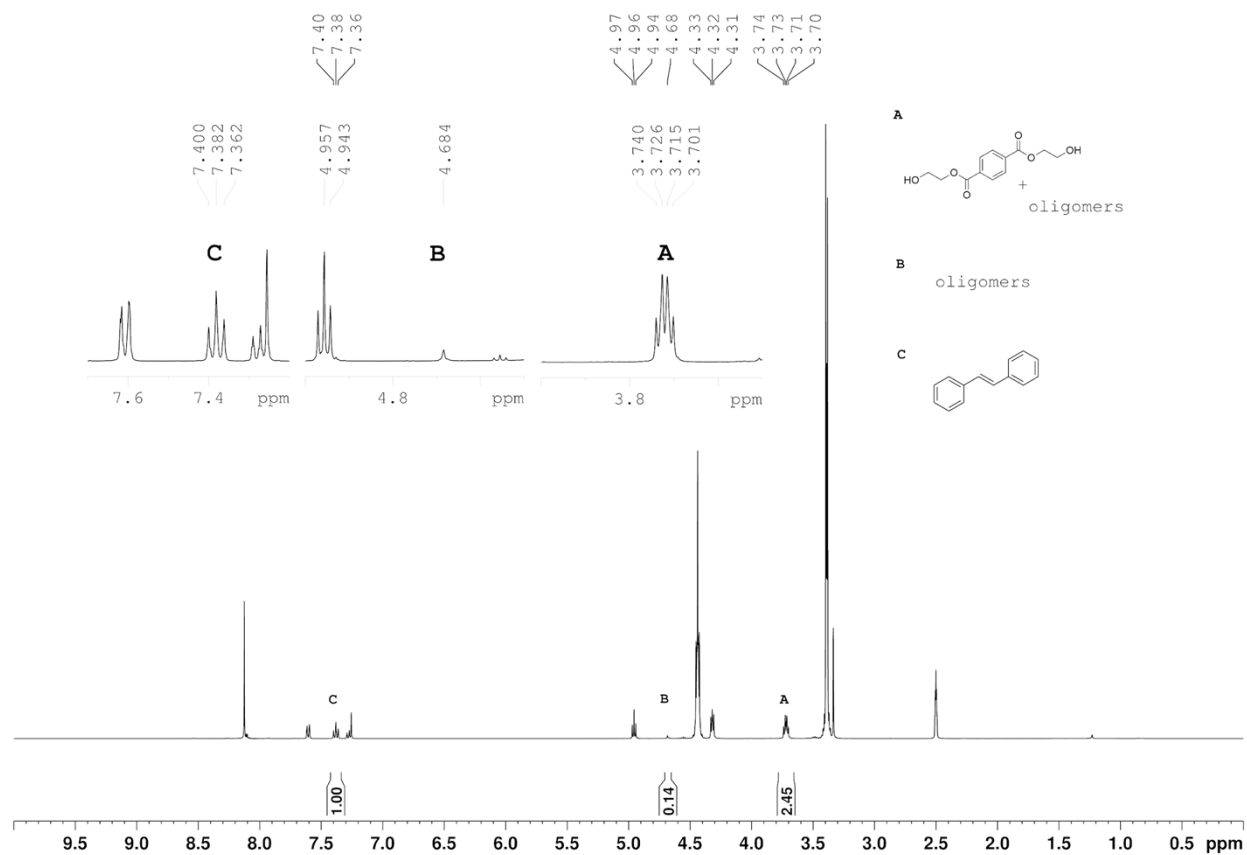

**$^1\text{H}\{^{13}\text{C}\}$  NMR (400 MHz, D<sub>1</sub> = 15 s, GARP-mediated  $^{13}\text{C}$  decoupling) of the PET:EG (1:4, wt:wt) experiment for NMR yield calculation, internal standard (*E*)-stilbene (Table 2, entry 2)**

### 3. Cooking oil catalyst characterisation and associated spectra

#### RS-cat (rapeseed oil-derived)

$\delta_c$  (101 MHz, CP/MAS SSNMR) 184.9, 183.3, 182.2, 181.5, 180.8, 130.0, 128.3, 37.6, 32.4, 30.5, 27.8, 26.8, 23.1, 14.4 ppm.

$\nu_{\text{MAX}}$  (neat)/ $\text{cm}^{-1}$ : 3008, 2923, 2853, 1746, 1574, 1449, 1239, 1162, 1050, 858, 721.

Dec.p. 318.9 °C (measured at the onset of a TGA spectrum)

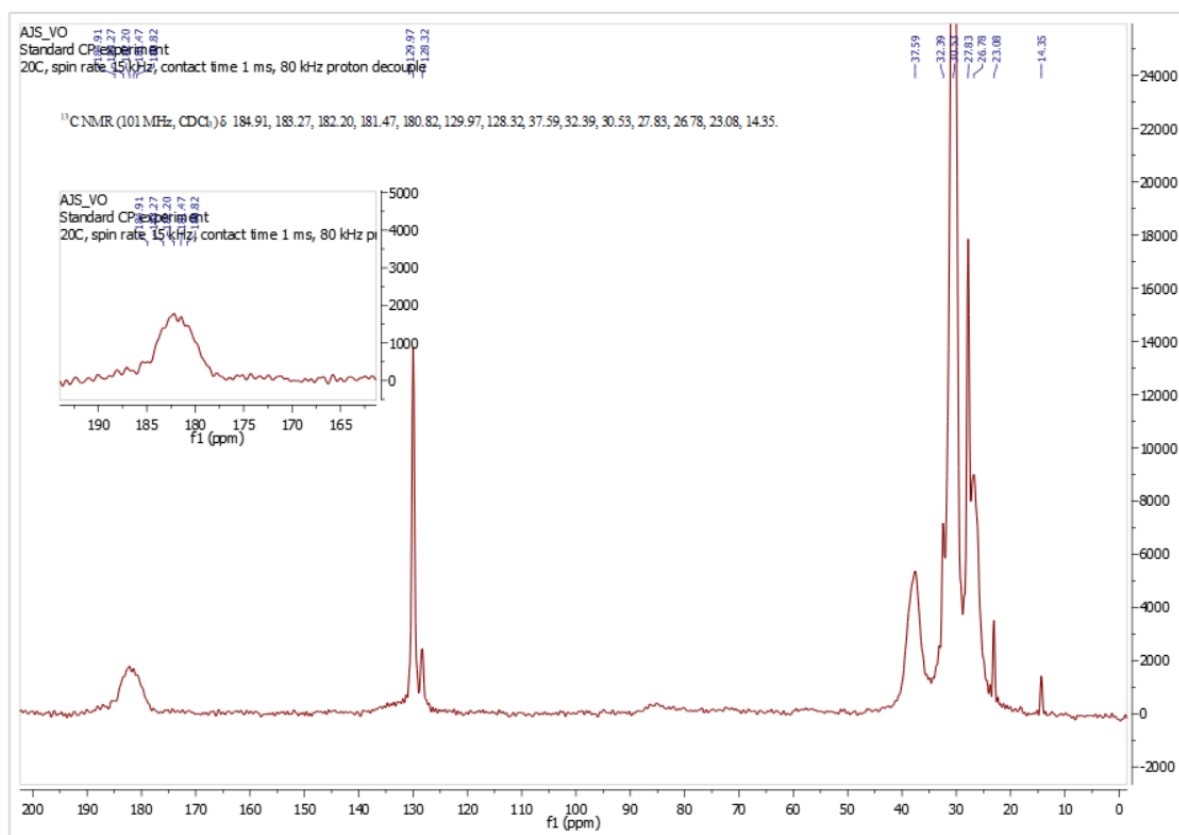

CP/MAS SSNMR (101 MHz) spectrum of RS-cat



### SF-cat (sunflower oil-derived)

$\delta_c$  (101 MHz, CP/MAS SSNMR)  $\delta$  184.7, 184.1, 182.0, 182.6, 130.0, 37.6, 32.4, 30.2, 23.1, 14.4 ppm.

$\nu_{\text{MAX}}$  (neat)/ $\text{cm}^{-1}$ : 3053, 2923, 2853, 1744, 1577, 1437, 1315, 1056, 1004, 886, 722

Dec.p. 319.5 °C (measured at the onset of a TGA spectrum)

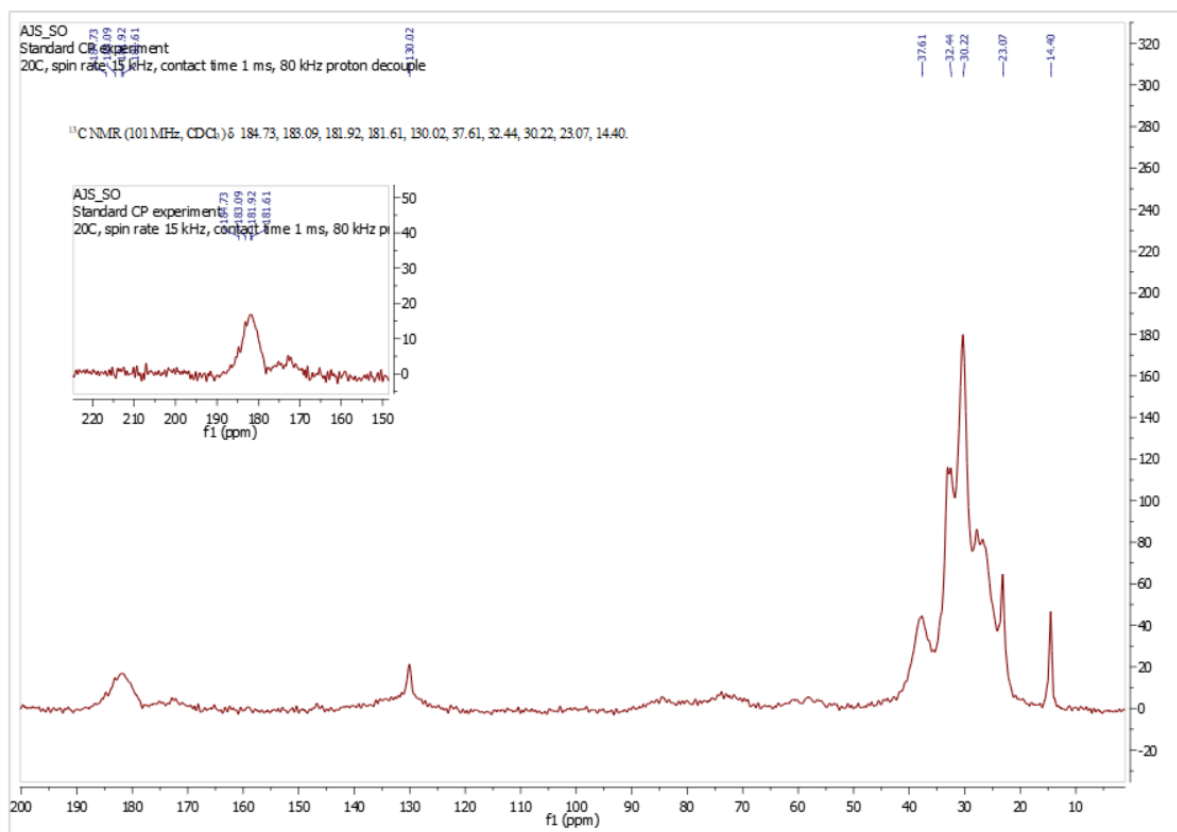

CP/MAS SSNMR (101 MHz) spectrum of SF-cat

### CO-cat (coconut oil-derived)

$\delta_c$  (101 MHz, CP/MAS SSNMR)  $\delta$  182.8, 182.1, 180.9, 179.1, 130.0, 40.5, 39.2, 37.6, 36.4, 34.4, 33.0, 28.1, 26.7, 24.5, 14.4 ppm.

$\nu_{\text{MAX}}$  (neat)/ $\text{cm}^{-1}$ : 2957, 2919, 2851, 1574, 1450, 1378, 1316, 1337, 1114, 1029, 933, 87, 790, 720.

Dec.p. 336.1 °C (measured at the onset of a TGA spectrum)

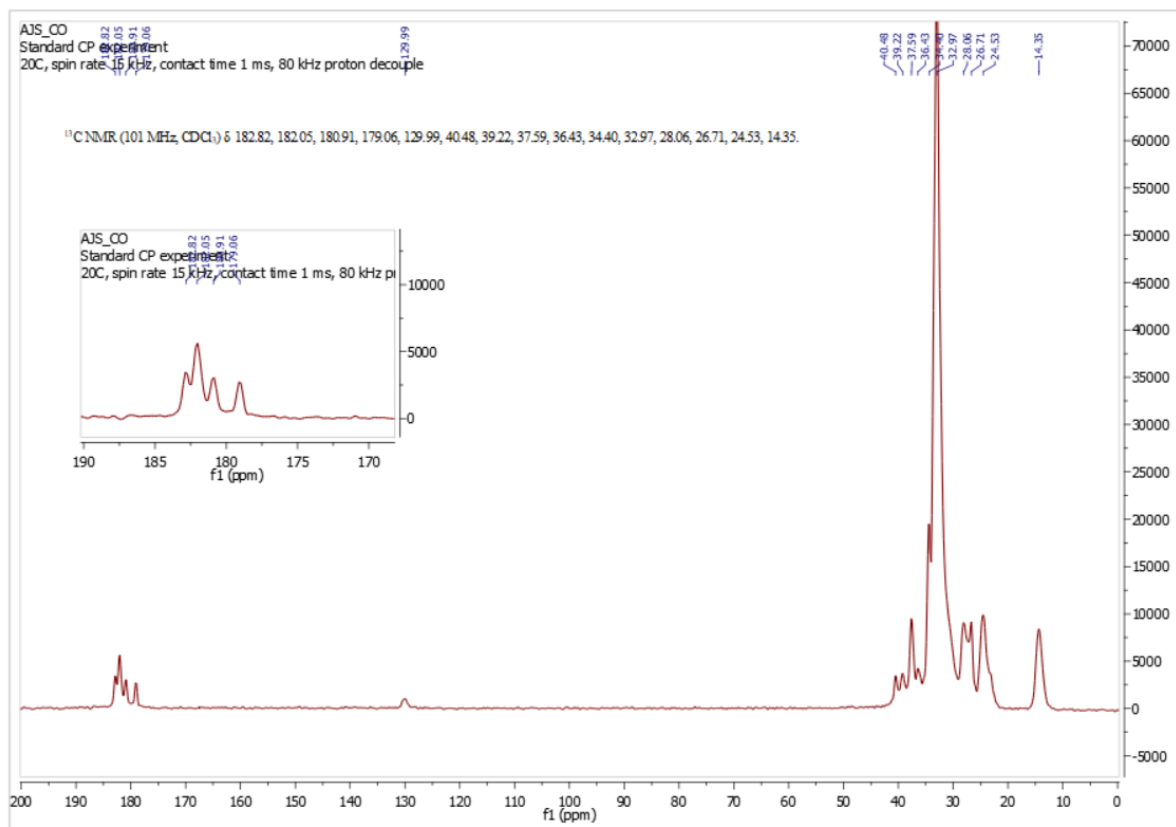

CP/MAS SSNMR (101 MHz) spectrum of CO-cat

### RES-cat (restaurant vegetable oil-derived)

$\delta_c$  (101 MHz, CP/MAS SSNMR)  $\delta$  183.9, 182.8, 182.1, 180.6, 179.9, 130.0, 128.4, 38.0, 30.6, 27.9, 26.7, 23.1, 14.3 ppm.

$\nu_{\text{MAX}}$  (neat)/ $\text{cm}^{-1}$ : 3010, 2922, 2852, 1567, 1442, 1316, 720.

Dec.p. 326.7 °C (measured at the onset of a TGA spectrum)

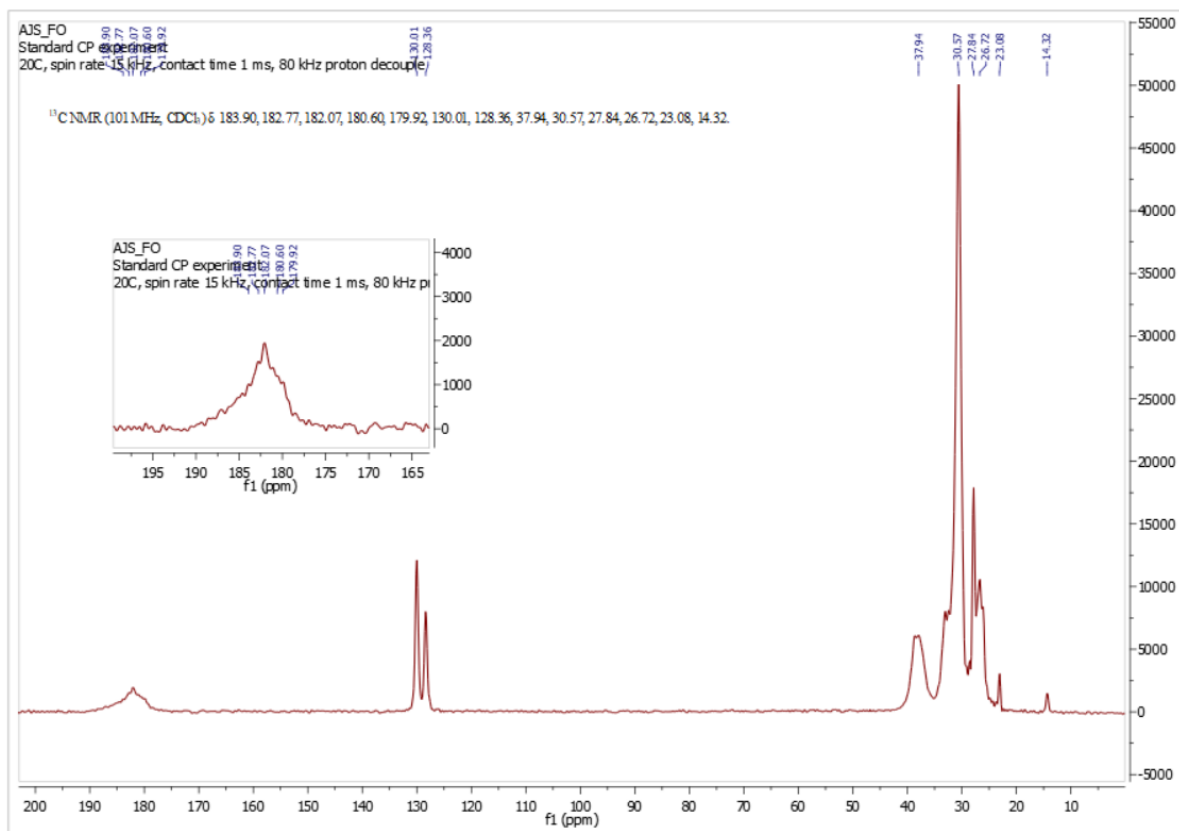

CP/MAS SSNMR (101 MHz) spectrum of RES-cat

**W-RES-cat (waste restaurant vegetable oil-derived)**

$\delta_c$  (101 MHz, CP/MAS SSNMR)  $\delta$  185.1, 182.7, 182.0, 130.0, 128.4, 37.7, 33.0, 30.6, 27.8, 26.7, 23.1, 14.3 ppm.

$\nu_{\text{MAX}}$  (neat)/ $\text{cm}^{-1}$ : 3010, 2922, 2852, 1573, 1446, 1312, 720.

Dec.p. 333.2 °C (measured at the onset of a TGA spectrum)

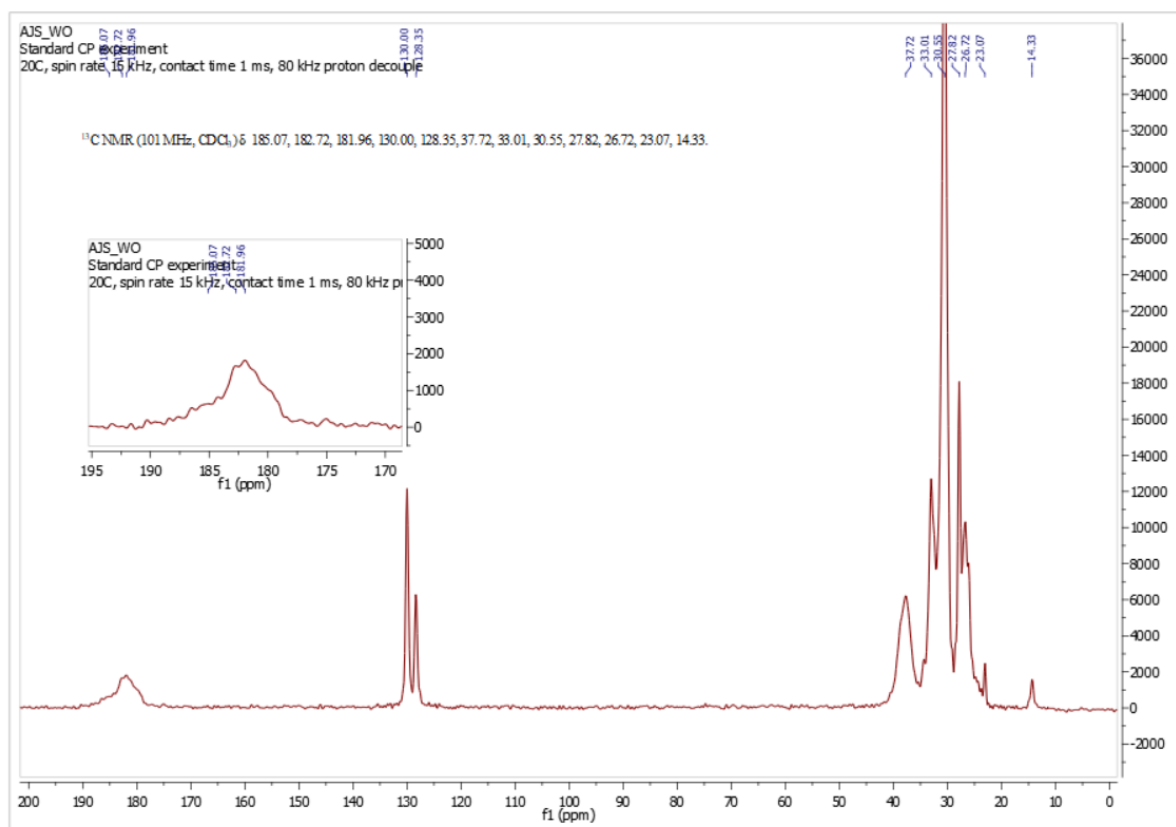

**CP/MAS SSNMR (101 MHz) spectrum of W-RES-cat**

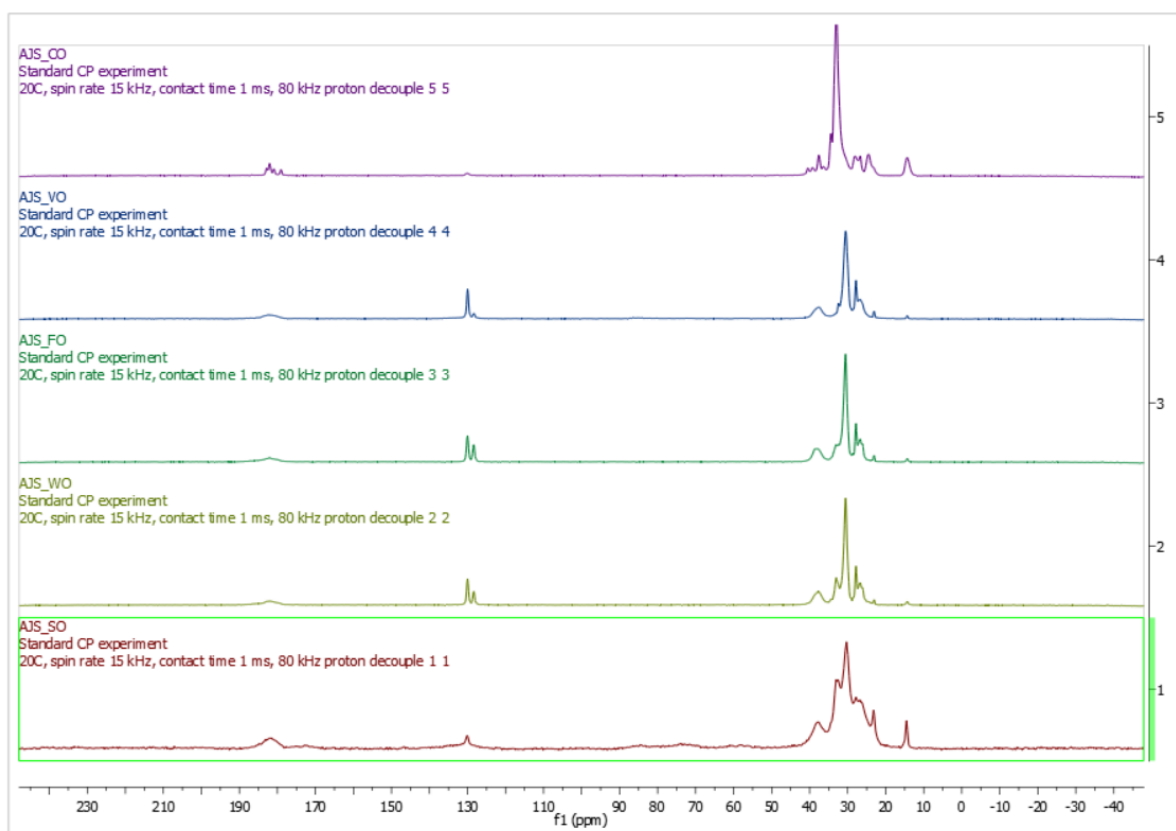

**Comparison of the CP/MAS SSNMR (101 MHz) spectra associated with the cooking oil catalysts  
(Bottom to top: SF-cat, W-RES-cat, RES-cat, RS-cat, CO-cat)**

| Cat              | Carbonyl<br>Region (ppm) | Olefinic<br>Region (ppm) | Aliphatic<br>Region (ppm) | Observations                                                     |
|------------------|--------------------------|--------------------------|---------------------------|------------------------------------------------------------------|
| <b>CO-cat</b>    | 182.8–179.1              | 130.00                   | 40.5–14.4                 | Higher saturation, shorter-chain fatty acids.                    |
| <b>RS-cat</b>    | 184.9–180.8              | 130.0, 128.3             | 37.6–14.4                 | High unsaturation, long-chain fatty acids.                       |
| <b>RES-cat</b>   | 183.9–179.9              | 130.0, 128.4             | 38.0–14.3                 | Distinct profile from the others, possibly soya content          |
| <b>W-RES-cat</b> | 185.1–182.0              | 130.0, 128.4             | 37.7–14.3                 | Possible thermal degradation evident in upfield carbonyl shifts. |
| <b>SF-cat</b>    | 184.7–181.6              | 130.0                    | 37.6–14.4                 | High linoleic acid content                                       |

#### 4. **Supplementary glycolysis experimental procedures using cooking oil-derived catalysts (Table 4) and associated NMR spectra**

##### **Glycolysis of PET using the waste oil-derived catalyst:**

An oven-dried carousel flask was charged with polyethylene terephthalate flakes (1.0 g, 5 mm x 5 mm), ethylene glycol (3.6 mL, 4 g) and oil-derived catalyst (1.5 w/w%, 15 mg).<sup>a</sup> The flask was placed under an atmosphere of nitrogen (balloon), and the reaction was stirred (800 rpm) for 50 min at 190 °C. The flask was removed from the carousel and was left to cool for 5 min. The reaction mixture was then diluted with deionised water (400 mL), and the resulting aqueous mixture was vigorously stirred for 20 min. Utilising a Bucker funnel the mixture was filtered and the pre-weighed filter paper was dried overnight in a vacuum oven at 60 °C to determine levels of unreacted PET residue and oligomers. The filtrate was then concentrated under vacuum to a total volume of 50 mL and cooled to 4 °C overnight to promote crystallisation. . The resulting crystals were filtered and subsequently dried overnight in a vacuum oven at 60 °C to obtain BHET as a crystalline white solid (1.10 g, 83% yield).

##### **Glycolysis of textile waste using waste oil catalysts:**

An oven-dried carousel flask was charged with textile cuttings (1.0 g, 5 mm x 5 mm), ethylene glycol (3.6 mL, 4 g) and oil-derived catalyst (1.5 w/w%, 15 mg).<sup>a</sup> The flask was placed under an atmosphere of nitrogen (balloon), and the reaction was stirred for 50 min. at 190 °C. The flask was removed from the carousel and was left to cool for 5 min. The reaction mixture was then diluted with deionised water (400 mL), and the resulting aqueous mixture was vigorously stirred for 20 min. Utilising a Bucker funnel the mixture was filtered and the pre weighed filter paper was dried overnight in a vacuum oven at 60 °C to determine levels of unreacted textile residue and oligomers. The filtrate was then concentrated under vacuum to a total volume of 50 mL and cooled to 4 °C overnight to promote crystallisation. The resulting crystals were filtered, and dried overnight in a vacuum oven at 60 °C to obtain BHET as a crystalline white solid (1.06 g, 80% yield).

##### **Glycolysis of PET using waste oil catalyst at gram scale:**

An oven-dried thick-walled glass tube was charged with polyethylene terephthalate flakes (5.0 g, 5 mm x 5 mm), ethylene glycol (18 mL, 20 g) and **W-RES-cat** (1.5 w/w%, 75 mg).<sup>a</sup> The flask was placed under an atmosphere of nitrogen (balloon) with septum, and the reaction was stirred (800 rpm) for 1 h at 190 °C. The thick-walled glass tube was removed from the oil bath and was left to cool for 5 min. The reaction mixture was then diluted with deionised water (2.0 L), and the resulting aqueous mixture was vigorously stirred for 20 min. Utilising a Bucker funnel the mixture was filtered and the pre-weighed filter paper was

dried overnight in a vacuum oven at 60 °C to determine levels of unreacted PET residue and oligomers. The filtrate was then concentrated under vacuum to a total volume of 300 mL and cooled to 4 °C overnight to promote crystallisation. The resulting crystals were filtered, the mother liquor further concentrated under vacuum to 25 mL and cooled again to 4 °C overnight. The resulting crystals were filtered, combined with the first crop and dried overnight in a vacuum oven at 60 °C to obtain BHET as a crystalline white solid (5.43 g, 82% yield).

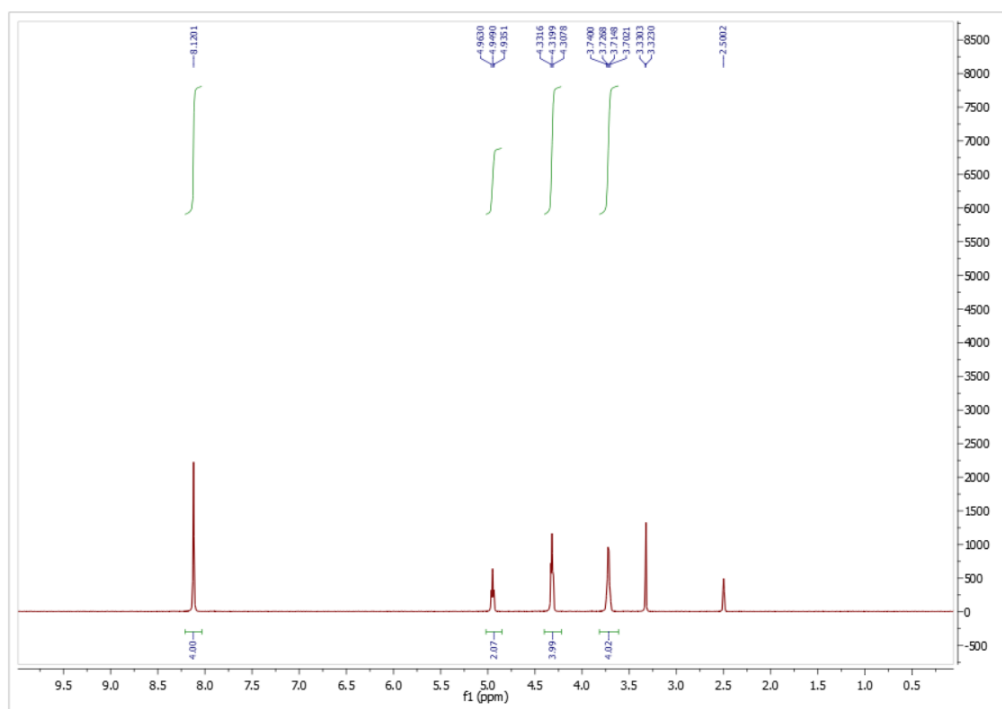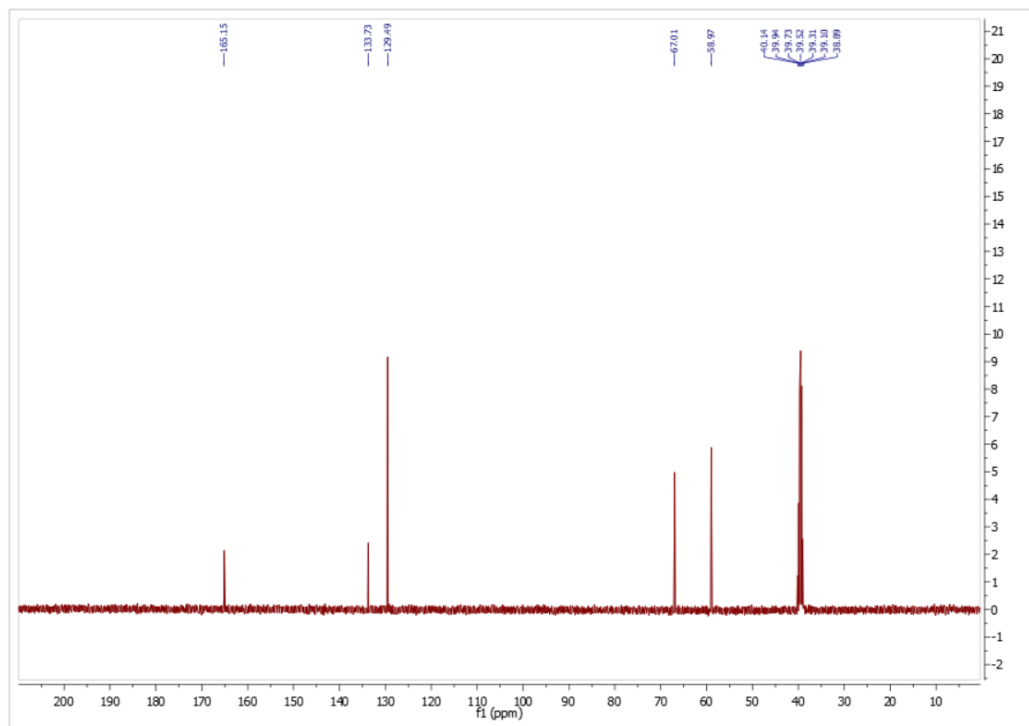

<sup>1</sup>H NMR (400 MHz) and <sup>13</sup>C NMR (100 MHz) spectra (DMSO-*d*<sub>6</sub>) of BHET synthesised with W-RES-cat



## 5. Magnesium stearate recycling: procedure and associated spectra

A two-necked 25 mL round bottomed flask equipped with a thermometer was charged with polyethylene terephthalate flakes ( $1.0000 \text{ g} \pm 0.0050 \text{ g}$ , 5 mm x 5 mm), ethylene glycol (9.0 mL) and magnesium stearate (0.0615 g, 0.104 mmol, 2 mol%).<sup>a</sup> The flask was placed under an atmosphere of nitrogen (balloon), and the reaction was stirred for 4 h at 180 °C (a clear transparent solution was obtained). The reaction vessel was left to cool for 5 min. The reaction mixture was then diluted with deionised water (400 mL), and the resulting aqueous mixture was vigorously stirred and heated to 90 °C. Utilising a pre-heated filter the insoluble catalyst was filtered, recovered from the mixture (0.0382 g, 62 %) and dried overnight in a vacuum oven at 60 °C. The filtrate was cooled to room temperature and traces of insoluble oligomeric material were removed by filtration. The filtrate was concentrated in vacuo to a total volume of 50 mL and cooled to 4 °C overnight to crystallise *bis*(2-hydroxyethyl)terephthalate (BHET). The resulting crystals were filtered and dried overnight in a vacuum oven to obtain BHET as a crystalline white solid (0.9601 g, 73%).

To assess the recyclability of the catalyst, a second experiment was performed in a carousel tube on 50% scale. The carousel tube was charged with polyethylene terephthalate flakes ( $0.5000 \text{ g} \pm 0.0025 \text{ g}$ , 5 mm x 5 mm), magnesium stearate (0.0308 g, 0.052 mmol, 2 mol%) and ethylene glycol (4.5 mL).<sup>b</sup> The tube was placed under an atmosphere of nitrogen (balloon), and the reaction was stirred for 4 h at 180 °C.<sup>c</sup> The reaction mixture was dilute with water (200 mL) and worked up using the previously stated procedure outlined above. Crystallisation was performed in 30 mL of aqueous solution at a temperature of 4 °C overnight. BHET was isolated as a crystalline white solid (0.5441 g, 82%).<sup>d</sup> M.p. 103.0-104.5 °C (lit.,<sup>3</sup> M.p. 103.1-107.4 °C).

<sup>1</sup>H NMR (400 MHz, DMSO-*d*<sub>6</sub>):  $\delta_{\text{H}}$  = 8.12 (s, 4H), 4.95 (t, 2H, *J* 5.3 Hz), 4.32 (t, 4H, *J* 4.7 Hz), 3.72 (dt, 4H, *J* 5.3 Hz, *J* 4.7 Hz) ppm.

<sup>a</sup>Mol% of catalyst is related to the number of moles of monomeric units (5.2 mmol) present in 1 g of polymer.

<sup>b</sup>Glycolysis experiments were carried out with Radleys Carousel 12 Plus Reaction Station.

<sup>c</sup>Temperature was measured in an adjacent carousel flask filled with the equivalent amount of ethylene glycol and equipped with a thermometer.

<sup>d</sup>From a duplicate experiment quantitative recovery of the catalyst was detected by gravimetry — however a considerable amount of the catalyst was lost stuck in the pores of the filter.

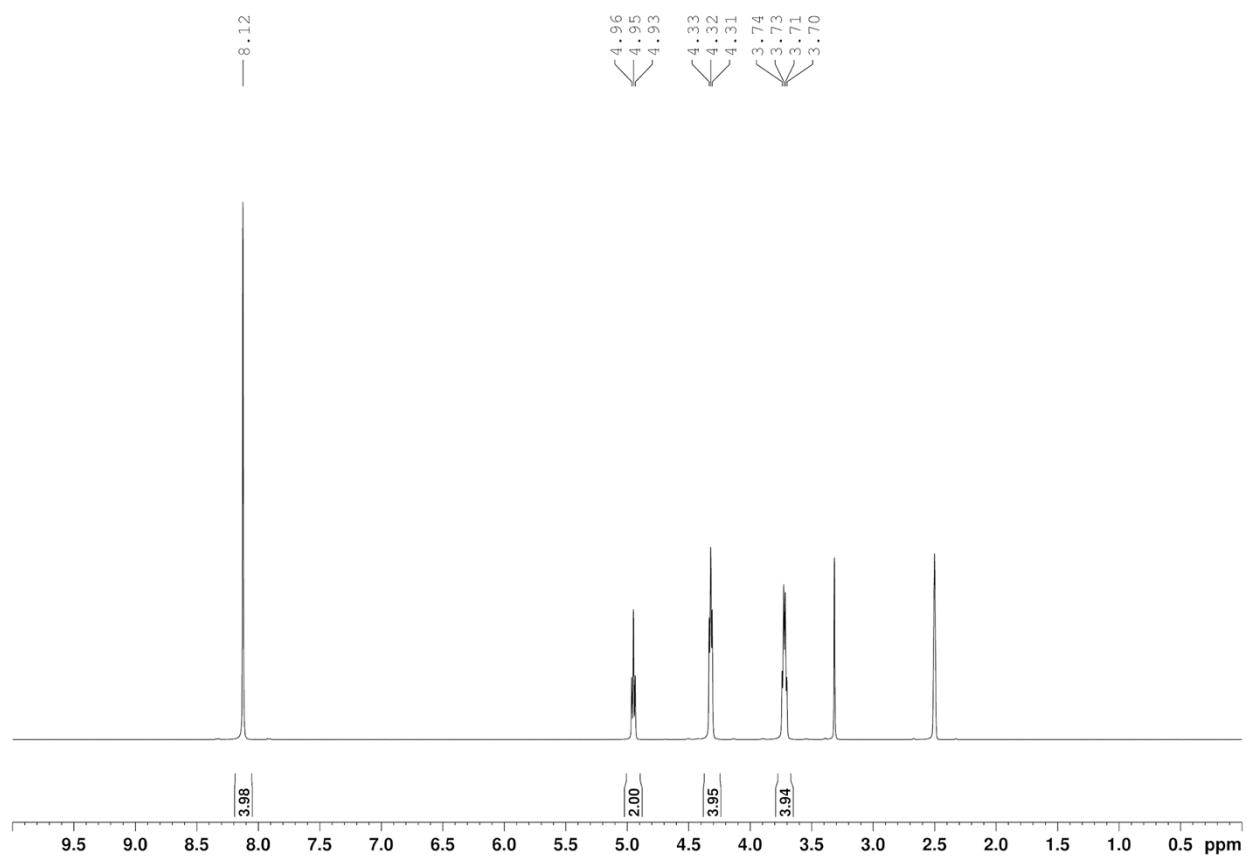

**$^1\text{H}$  NMR spectrum (400 MHz) of isolated BHET from the catalyst recyclability experiment (1<sup>st</sup> run)**

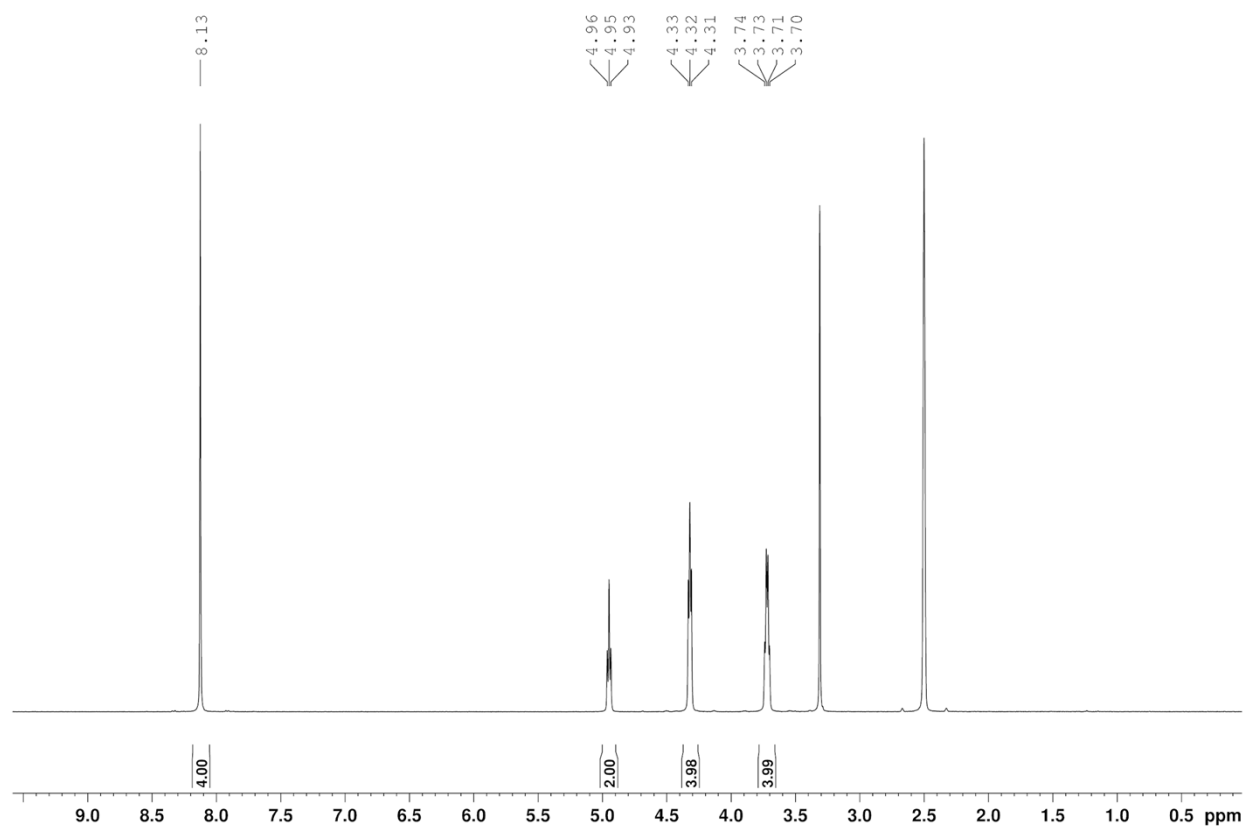

$^1\text{H}$  NMR spectrum (400 MHz) of isolated BHET from the catalyst recyclability experiment (2<sup>nd</sup> run)

6. Pictures of the oils and oil-derived magnesium soap catalysts

|                                                                                                                                                                                                                                                                                                                                                                                                                                                                                                                                                                                                                                                                                                                           |                                                                                    |
|---------------------------------------------------------------------------------------------------------------------------------------------------------------------------------------------------------------------------------------------------------------------------------------------------------------------------------------------------------------------------------------------------------------------------------------------------------------------------------------------------------------------------------------------------------------------------------------------------------------------------------------------------------------------------------------------------------------------------|------------------------------------------------------------------------------------|
|                                                                                                                                                                                                                                                                                                                                                                                                                                                                                                                                                                                                                                         |  |
| <p><b>Supermarket-purchased oil (RS, CO, SF)</b></p>                                                                                                                                                                                                                                                                                                                                                                                                                                                                                                                                                                                                                                                                      | <p><b>Restaurant oil (RES, W-RES)</b></p>                                          |
|                                                                                                                                                                                                                                                                                                                                                                                                                                                                                                                                                                                                                                       |                                                                                    |
| <p><b>Oil-derived catalysts</b></p> <div style="display: flex; justify-content: space-around; align-items: center;"> <div style="border: 1px solid black; border-radius: 15px; padding: 5px; background-color: #fff9c4;">SF cat.</div> <div style="border: 1px solid black; border-radius: 15px; padding: 5px; background-color: #fff9c4;">W-RES cat.</div> <div style="border: 1px solid black; border-radius: 15px; padding: 5px; background-color: #fff9c4;">CO cat.</div> <div style="border: 1px solid black; border-radius: 15px; padding: 5px; background-color: #fff9c4;">RES cat.</div> <div style="border: 1px solid black; border-radius: 15px; padding: 5px; background-color: #fff9c4;">RS cat.</div> </div> |                                                                                    |

## 7. Cooking oil-derived magnesium soap catalysts: fatty acid analysis

Five samples (Table 1) were analysed for total fatty acid profile by gas chromatography flame ionisation detection (GC-FID). Samples were analysed in triplicate.

FAME preparation was carried out as described by Ichihara and Fukubayashi<sup>4</sup> with some modifications. Into a 2 ml amber GC vial 5 mg of salt sample was weighed out and 50  $\mu$ L of internal standard, undecanoic acid at 1000 mg/L in heptane, was added. 0.5 ml methanol and 0.5 ml  $\text{BF}_3$ /methanol (12% v/v) was added. The vial was capped with a screw cap containing a PTFE/silicone septa. The vial was heated to 80  $^{\circ}\text{C}$  for 90 min and then allowed to cool to room temperature. Water (0.5 mL) and hexane (0.5 mL) were added and the vial vortexed to extract the esters into the hexane layer. The top layer was transferred into vial with a 250  $\mu$ L insert and 1  $\mu$ L was injected for GC analysis.

GC-FID Analysis was carried out on a Thermo Trace 1600 gas chromatograph (Thermo Fisher Scientific, Altrincham, United Kingdom) equipped with a flame ionisation detector. Sample introduction was accomplished using Triplus RSH autosampler to a PTV inlet containing a wool packed liner. The injector was set at 250  $^{\circ}\text{C}$  with a 1:50 split. FAMES were separated on a select FAME column (Agilent Technologies, Little Island, Cork, Ireland, 100 m x 250  $\mu\text{m}$  x 0.25 m). The column oven was set at 80  $^{\circ}\text{C}$ , held for 8 min, increased to 160  $^{\circ}\text{C}$  at a rate of 20  $^{\circ}\text{C}/\text{min}$ , increased to 198 $^{\circ}\text{C}$  at a rate of 1  $^{\circ}\text{C}/\text{min}$ , held for 10 min and then increased to 250  $^{\circ}\text{C}/\text{min}$  at a rate of 5  $^{\circ}\text{C}/\text{min}$  and held for 15 min. Total runtime was 85.4 min. the carrier gas was helium and set at a constant flow rate of 1 mL/min. The FID was set at 250  $^{\circ}\text{C}$ .

### Fatty acid information

| Chain length | Bond position      | Configuration | Group <sup>a</sup> | Systematic name            | Trivial name                                          | Abbreviation |
|--------------|--------------------|---------------|--------------------|----------------------------|-------------------------------------------------------|--------------|
| C4:0         |                    |               | SFA                | Butanoic                   | Butyric                                               |              |
| C6:0         |                    |               | SFA                | Hexanoic                   | Caproic                                               |              |
| C8:0         |                    |               | SFA                | Octanoic                   | Caprylic                                              |              |
| C10:0        |                    |               | SFA                | Decanoic                   | Capric                                                |              |
| C12:0        |                    |               | SFA                | Dodecanoic                 | Lauric                                                |              |
| C14:0        |                    |               | SFA                | Tetradecanoic              | Myristic                                              |              |
| C14:1        | $\omega$ -5 or 5-n | Cis           | MUFA               | $\Delta$ 9-Tetradecenoic   | Myristoleic                                           |              |
| C15:0        |                    |               | SFA                | Pentadecanoic              |                                                       |              |
| C15:1        | $\omega$ -5 or 5-n | cis           | MUFA               | $\Delta$ 10-Pentadecenoic  |                                                       |              |
| C16          |                    |               | SFA                | Hexadecanoic               | Palmitic                                              |              |
| C16:1        | $\omega$ -7 or 7-n | Cis           | MUFA               | $\Delta$ 9-Hexadecenoic    | Palmitoleic                                           |              |
| C17          |                    |               | SFA                | Heptadecanoic              |                                                       |              |
| C17:1        | $\omega$ -7 or 7-n | Cis           | MUFA               | $\Delta$ 10-Heptadecenoic  |                                                       |              |
| C18:0        |                    |               | SFA                | Octadecanoic               | Stearic                                               |              |
| C18:1 TFA    |                    | trans         |                    | Sum of C18:1 trans isomers | All trans 4 to 16 octadecenoic                        |              |
| C18:1        | $\omega$ -9 or 9-n | Cis           | MUFA               | $\Delta$ 9-Octadecenoic    | Oleic                                                 |              |
| C18:2 TFA    |                    | trans         |                    | Sum of C18:2 trans isomers | All trans 9,12 Octadecadienoic in deodorized oils and |              |

| Chain length | Bond position      | Configuration | Group <sup>a</sup> | Systematic name                           | Trivial name                                                                                                 | Abbreviation |
|--------------|--------------------|---------------|--------------------|-------------------------------------------|--------------------------------------------------------------------------------------------------------------|--------------|
|              |                    |               |                    |                                           | trans originated from milk fat (i.e. C18:2 cis-9, trans 13, C18:2 trans-8,cis-12 and C18:2 trans-11, cis 15) |              |
| C18:2        | $\omega$ -6 or 6-n | cis           | PUFA               | $\Delta$ 9,12 Octadecadienoic             | Linoleic                                                                                                     | LA           |
| C18:2CLA     | $\omega$ -7 or 7-n | Cis/trans     | PUFA               | $\Delta$ 9,11 Octadecadienoic             | Rumelic                                                                                                      | CLA          |
| C18:3        | $\omega$ -6 or 6-n | Cis           | PUFA               | $\Delta$ 6,9,12 Octadecatrienoic          | Gamma- Linoleic                                                                                              |              |
| C18:3 TFA    |                    | trans         |                    | Sum of C18:2 trans isomers                | All trans 9,12,15 Octadecatrienoic                                                                           |              |
| C18:3        | $\omega$ -3 or 3-n | Cis           | PUFA               | 9,12,15 Octadecatrienoic                  | Linolenic                                                                                                    | ALA          |
| C20:0        |                    |               | SFA                | Eicosanoic                                | Arachidic                                                                                                    |              |
| C20:1        | $\omega$ -6 or 6-n | Cis           | MUFA               | $\Delta$ 11- Eicosenoic                   | Gondoic                                                                                                      |              |
| C20:2        | $\omega$ -6 or 6-n | Cis           | PUFA               | $\Delta$ 11,14- Eicosadienoic             |                                                                                                              |              |
| C20:3        | $\omega$ -3 or 3-n | Cis           | PUFA               | $\Delta$ 8,11,14- Eicosatrienoic          | Dihomo-gamma-linolenic (DHGLA)                                                                               |              |
| C20:3        | $\omega$ -6 or 6-n | Cis           | PUFA               | $\Delta$ 8,14,17- Eicosatrienoic          |                                                                                                              |              |
| C20:4        | $\omega$ -3 or 3-n | Cis           | PUFA               | $\Delta$ 5,8,11,14- Eicosatetraenoic      | Arachidonic                                                                                                  | ARA          |
| C20:5        |                    |               | SFA                | $\Delta$ 5,8,11,14,17- Eicosapentaenoic   | Eicosapentaenoic                                                                                             | EPA          |
| C21:0        |                    |               | SFA                | Heneicosanoic                             |                                                                                                              |              |
| C22:0        |                    |               | SFA                | Docosanoic                                | Behenic                                                                                                      |              |
| C22:1        | $\omega$ -9 or 9-n | Cis           | MUFA               | $\Delta$ 13-Docosenoic                    | Erucic                                                                                                       |              |
| C22:2        | $\omega$ -6 or 6-n | Cis           | PUFA               | $\Delta$ 13,16- Docosadienoic             |                                                                                                              |              |
| C22:6        | $\omega$ -3 or 3-n | Cis           | PUFA               | $\Delta$ 4,7,10,13,16,19- Docosahexaenoic | Docosahexaenoic                                                                                              | DHA          |
| C24:0        |                    |               | SFA                | Tetracosanoic                             | Lignoceric                                                                                                   |              |
| C24:1        | $\omega$ -9 or 9-n | Cis           | MUFA               | $\Delta$ 15-Tetracosenoic                 | Nervonic                                                                                                     |              |

<sup>a</sup>Do not include trans fatty acids in MUFA and PUFA sums.

# Results: fatty acids identified in the catalyst samples

| Fatty acid <sup>a</sup> | CO-cat         | RES-cat        | W-RES-cat      | SF-cat         | RS-cat         |
|-------------------------|----------------|----------------|----------------|----------------|----------------|
| C4:0                    | 0 +/- 0        | 0.11 +/- 0.02  | 0.09 +/- 0.04  | 0.06 +/- 0.01  | 0.06 +/- 0     |
| C6:0                    | 0 +/- 0        | 1.97 +/- 0.08  | 2.17 +/- 0.02  | 4.68 +/- 0.04  | 1.26 +/- 0.02  |
| C8:0                    | 0.56 +/- 0.01  | 0.93 +/- 0.05  | 0.78 +/- 0.02  | 1.52 +/- 0.04  | 1.5 +/- 0.01   |
| C10:0                   | 4.4 +/- 0.05   | 0.06 +/- 0.02  | 0.07 +/- 0     | 0.11 +/- 0     | 0.17 +/- 0.01  |
| C11:0                   | 0.84 +/- 0.04  | 1.71 +/- 0.17  | 1.64 +/- 0.08  | 2.28 +/- 0.2   | 1.7 +/- 0.05   |
| C12:0                   | 46.22 +/- 0.13 | 0.04 +/- 0     | 0.07 +/- 0.01  | 0.03 +/- 0     | 0.04 +/- 0.02  |
| C13:0                   | 0.04 +/- 0     | 0.05 +/- 0.01  | 0.03 +/- 0     | 0.02 +/- 0     | 0.02 +/- 0     |
| C14:0                   | 21.39 +/- 0.1  | 0.26 +/- 0.01  | 0.37 +/- 0.01  | 0.27 +/- 0.01  | 0.13 +/- 0.01  |
| C14:1                   | 0 +/- 0        | 0 +/- 0        | 0 +/- 0        | 0 +/- 0        | 0 +/- 0        |
| C15:0                   | 0.01 +/- 0     | 0.07 +/- 0.01  | 0.08 +/- 0     | 0.08 +/- 0     | 0.07 +/- 0     |
| C15:1                   | 0 +/- 0        | 0 +/- 0        | 0 +/- 0        | 0 +/- 0        | 0 +/- 0        |
| C16:0                   | 10.18 +/- 0.03 | 27.79 +/- 0.25 | 29.18 +/- 0.16 | 20.69 +/- 0.55 | 10.3 +/- 0.04  |
| C16:1                   | 0.01 +/- 0     | 0.08 +/- 0     | 0.09 +/- 0     | 0.08 +/- 0     | 0.14 +/- 0     |
| C17:0                   | 1.6 +/- 0.07   | 3.7 +/- 0.34   | 3.49 +/- 0.15  | 4.43 +/- 0.36  | 3.34 +/- 0.12  |
| C18:0                   | 5.33 +/- 0.01  | 15.11 +/- 0.21 | 12.53 +/- 0.08 | 15.28 +/- 0.42 | 4.76 +/- 0.04  |
| C18:1 CFA               | 7.92 +/- 0.03  | 33.66 +/- 0.72 | 35.7 +/- 0.21  | 34.98 +/- 0.71 | 54.83 +/- 0.26 |
| C18:1 TFA               | 0 +/- 0        | 0.52 +/- 0.03  | 0.43 +/- 0.03  | 0.39 +/- 0.02  | 1.33 +/- 0.02  |
| C18:2 t10,c12           | 0 +/- 0        | 0.05 +/- 0     | 0.05 +/- 0     | 0.1 +/- 0      | 0.3 +/- 0.01   |
| C18:2 c9,t11            | 0 +/- 0        | 0.31 +/- 0.01  | 0.45 +/- 0.05  | 0.43 +/- 0.02  | 1.12 +/- 0.04  |
| C18:2 TFA               | 0 +/- 0        | 1.03 +/- 0     | 0.83 +/- 0.04  | 1.16 +/- 0.04  | 0.71 +/- 0.06  |
| C18:2n6c                | 1.18 +/- 0.01  | 4.05 +/- 0.23  | 2.23 +/- 0.03  | 0.03 +/- 0     | 0.06 +/- 0     |
| C18:3 TFA               | 0 +/- 0        | 0.07 +/- 0.02  | 0.1 +/- 0.03   | 0.07 +/- 0.02  | 0.18 +/- 0.01  |
| C18:3n3                 | 0 +/- 0        | 0.38 +/- 0.02  | 0.25 +/- 0.02  | 0.09 +/- 0     | 0.25 +/- 0.01  |
| C18:3n6                 | 0 +/- 0        | 0.07 +/- 0     | 0.04 +/- 0.01  | 0.04 +/- 0.02  | 0.14 +/- 0.01  |
| C19:0                   | 0.01 +/- 0     | 0.05 +/- 0     | 0.04 +/- 0     | 0.05 +/- 0.01  | 0.08 +/- 0     |
| C20:0                   | 0.15 +/- 0.01  | 1.45 +/- 0.02  | 1.49 +/- 0.04  | 1.31 +/- 0.08  | 1.9 +/- 0.01   |
| C20:1                   | 0.04 +/- 0.01  | 0.36 +/- 0.01  | 0.37 +/- 0.01  | 0.19 +/- 0.02  | 1.3 +/- 0.01   |
| C20:2                   | 0 +/- 0        | 1.74 +/- 0.09  | 2.55 +/- 0.09  | 3.88 +/- 1.58  | 7.48 +/- 0.13  |
| C20:3n3                 | 0 +/- 0        | 0 +/- 0        | 0 +/- 0        | 0 +/- 0        | 0 +/- 0        |
| C20:3n6                 | 0 +/- 0        | 0 +/- 0        | 0 +/- 0        | 0 +/- 0        | 0.04 +/- 0     |
| C20:4n6                 | 0 +/- 0        | 0 +/- 0        | 0 +/- 0        | 0 +/- 0        | 0 +/- 0        |
| C20:5                   | 0 +/- 0        | 0 +/- 0        | 0 +/- 0        | 0.04 +/- 0     | 0.15 +/- 0.01  |
| C21:0                   | 0 +/- 0        | 0.92 +/- 0.01  | 1.04 +/- 0.02  | 1.12 +/- 0.03  | 2.61 +/- 0.09  |
| C22:0                   | 0.02 +/- 0.01  | 1.87 +/- 0.01  | 2.08 +/- 0.01  | 4.23 +/- 0.1   | 2.15 +/- 0.01  |
| C22:1                   | 0.02 +/- 0.01  | 0.06 +/- 0.01  | 0.09 +/- 0.02  | 0.13 +/- 0.01  | 0.36 +/- 0     |
| C22:2                   | 0 +/- 0        | 0.06 +/- 0.01  | 0.04 +/- 0.01  | 0.26 +/- 0.04  | 0.27 +/- 0.02  |
| C22:6n3                 | 0 +/- 0        | 0.08 +/- 0     | 0.06 +/- 0.01  | 0.21 +/- 0.06  | 0.11 +/- 0.05  |
| C23:0                   | 0 +/- 0        | 0.27 +/- 0.01  | 0.24 +/- 0.04  | 0.21 +/- 0.01  | 0.13 +/- 0     |
| C24:0                   | 0.05 +/- 0.02  | 0.65 +/- 0.01  | 0.77 +/- 0.06  | 1.34 +/- 0.04  | 0.73 +/- 0.04  |
| C24:1n9                 | 0 +/- 0        | 0.48 +/- 0.05  | 0.51 +/- 0.05  | 0.19 +/- 0.25  | 0.31 +/- 0.01  |

<sup>a</sup>Values are presented as average (n=3) g/100g fat.

## 8. References

1. Bahadoor, A., Brinkmann, A. & Melanson, J. E. *Anal. Chem.* **93**, 851–858 (2020)
2. Fehér, Z., Kiss, J., Kisszékelyi, P., Molnár, J., Huszthy, P., Kárpáti L. & Kupai, J *Green Chem.* **24**, 8447–8459 (2022).
3. Javed, S., Ropel, D. & and Vogt, D. *Green Chem.* **25**, 1442-1452 (2023)
4. Ichihara, K & Fukubayashi, Y. *J. Lipid Res.* **51**, 635-640 (2010).
